1 **A DNA-binding protein tunes septum placement during *Bacillus subtilis***  
2 **sporulation**

3  
4

5 Emily E. Brown<sup>1,%</sup>, Allyssa K. Miller<sup>1,%</sup>, Inna V. Krieger<sup>2</sup>, Ryan M. Otto<sup>1</sup>, James C.  
6 Sacchettini<sup>1,2</sup> and Jennifer K. Herman<sup>1\*</sup>

7  
8  
9

Short title: Septum positioning during *B. subtilis* sporulation

10 Department of Biochemistry and Biophysics, Texas A&M University, College Station, TX  
11 USA

\*Address correspondence to [jkherman@tamu.edu](mailto:jkherman@tamu.edu)

12

13 <sup>1</sup>Department of Biochemistry and Biophysics, Texas A&M University, College Station TX

14 <sup>2</sup>Department of Chemistry, Texas A&M University, College Station TX

15

16 %Authors contributed equally

17 \*Corresponding author

18 Division precision during *Bacillus* sporulation

19

20

21

22

23

24

25

26

27

28

29 **Abstract**

30 *Bacillus subtilis* is a soil bacterium capable of differentiating into a spore form resistant  
31 to desiccation, UV radiation, and heat. Early in spore development the cell possesses  
32 two copies of a circular chromosome, anchored to opposite cell poles via DNA proximal  
33 to the origin of replication (*oriC*). As sporulation progresses an FtsZ ring (Z-ring)  
34 assembles close to one pole and directs septation over one chromosome. The polar  
35 division generates two cell compartments with differing chromosomal contents. The  
36 smaller “forespore” compartment initially contains only 25-30% of one chromosome and  
37 this transient genetic asymmetry is required for differentiation. At the population level,  
38 the timely assembly of polar Z-rings and the precise capture of the chromosome in the  
39 forespore both require RefZ, a DNA-binding protein synthesized early in  
40 sporulation. To mediate precise capture of the chromosome RefZ must bind to specific  
41 DNA motifs (*RBMs*) that are localized near the poles around the time of septation,  
42 suggesting RefZ binds to the *RBMs* to affect positioning of the septum relative to the  
43 chromosome. RefZ’s mechanism of action is unknown, however, cells artificially  
44 induced to express RefZ during vegetative growth cannot assemble Z-rings or divide,  
45 leading to the hypothesis that RefZ-*RBM* complexes mediate precise chromosome  
46 capture by modulating FtsZ function. To investigate this possibility, we isolated 10 RefZ  
47 loss-of-function (rLOF) variants unable to inhibit cell division when expressed during  
48 vegetative growth, yet were still capable of binding *RBM*-containing DNA. Sporulating  
49 cells expressing the rLOF variants in place of wild-type RefZ phenocopy a  $\Delta$ *refZ* mutant,  
50 suggesting that RefZ mediates chromosome capture through an FtsZ-dependent  
51 mechanism. To better understand the molecular basis of RefZ’s activity, the crystal

52 structure of RefZ was solved and wild-type RefZ and the rLOF variants were further  
53 characterized. Our data suggest that RefZ's oligomerization state and specificity for the  
54 *RBM*s are critical determinants influencing RefZ's ability to affect FtsZ dynamics *in*  
55 *vivo*. We propose that *RBM*-bound RefZ complexes function as a developmentally  
56 regulated nucleoid occlusion system for fine-tuning the position of the septum relative to  
57 the chromosome during sporulation.

58

### 59 **Author Summary**

60 The Gram-positive bacterium *B. subtilis* can differentiate into a dormant cell type called  
61 a spore. Early in sporulation the cell divides near one pole, generating two  
62 compartments: a larger mother cell and a smaller forespore (future spore). Only  
63 approximately 30 percent of one chromosome is initially captured in the forespore  
64 compartment at the time of division and this genetic asymmetry is critical for sporulation  
65 to progress. Precise chromosome capture requires RefZ, a sporulation protein that  
66 binds to specific DNA motifs (*RBM*s) positioned at the pole near the site of cell division.  
67 How RefZ functions at the molecular level is not fully understood. Here we show that  
68 RefZ-*RBM* complexes facilitate chromosome capture by acting through the major cell  
69 division protein FtsZ.

70

71

72

73

## 74 **Introduction**

75           To spatially regulate cellular processes, some macromolecules within the cell  
76 must assume a heterogeneous distribution. One way that bacteria create  
77 heterogeneity along the bacterial envelope is to utilize proteins that induce and/or  
78 partition to sites of membrane curvature<sup>1,2</sup>. From there, membrane curvature proteins  
79 can serve as platforms for the localization of additional molecules in the cell. For  
80 example, in the rod-shaped bacterium *Bacillus subtilis*, the negative membrane  
81 curvature-sensing protein DivIVA coalesces adjacent to past and future cell division  
82 sites where it then recruits a cell division regulatory system called Min to inhibit FtsZ  
83 polymerization at non-medial sites<sup>3-7</sup>. Another commonly employed mechanism to  
84 restrict physiological processes to specific regions of a cell is to require that molecules  
85 assemble into larger, multi-subunit complexes to be active. For example, cell division,  
86 which requires the coordinated synthesis and turnover of all layers of the cell envelope  
87 at midcell, is carried out by a localized multi-subunit complex comprised of over 30  
88 proteins called the “divisome”<sup>8</sup>.

89           Bacteria also elicit subcellular heterogeneity by harnessing intrinsic properties of  
90 macromolecules, such as diffusion rates, oligomerization potential, and affinity for other  
91 molecules in the cell<sup>9</sup>. The ParABS system utilized to segregate chromosomes in  
92 *Caulobacter crescentus* elegantly demonstrates how bacteria can exploit the intrinsic  
93 properties of molecules to achieve spatial regulation. In the ParABS system, protein-  
94 protein and protein-DNA interactions, regulated ATP hydrolysis, and diffusion are  
95 harnessed to achieve a new-pole biased gradient of the non-specific DNA-binding  
96 ParA. ParB bound at a *parS* site adjacent to *oriC* is initially anchored at the old

97 pole<sup>10,11</sup>. However, once a new round of DNA replication is initiated, affinity of ParB for  
98 ParA drives the net movement of the newly formed ParB-*parS* complex (and the  
99 replicated *oriC*) toward the ParA-enriched new pole, thus facilitating chromosome  
100 segregation<sup>12,13</sup>.

101         The ParABS system not only demonstrates how the intrinsic properties of  
102 molecules can underlie heterogeneity of macromolecules within the cell, but also  
103 exemplifies how the nucleoid itself can be utilized in spatial regulation. The nucleoid is  
104 highly organized<sup>14</sup> and many DNA-binding proteins restrict their associated functions to  
105 specific cellular addresses by binding to unique DNA motifs. For example, transcription  
106 factors only regulate transcription at the promoters they associate with. There are also  
107 examples of DNA-binding proteins that bind to specific motifs to regulate the initiation of  
108 DNA replication (Spo0J/Soj)<sup>15</sup>, mediate DNA repair and recombination (MutL,  
109 XerCD)<sup>16,17</sup>, and segregate chromosomes (ParAB, Spo0J/SMC)<sup>12,13,18,19</sup>. Moreover,  
110 some DNA-binding proteins simultaneously interact with the nucleoid and the cell  
111 envelope to perform functions in DNA replication (DnaA, SeqA)<sup>20,21</sup>, chromosome  
112 organization (RacA, SMC)<sup>22-25</sup>, DNA segregation (FtsK/SpoIIIE)<sup>26</sup>, and regulation of cell  
113 division (Noc)<sup>27</sup>.

114         The most extensively studied example of a DNA-binding protein that uses the  
115 nucleoid to spatially restrict cell division is SlmA, a TetR family protein found in  
116 *Escherichia coli*<sup>28</sup> and several other Gammaproteobacteria including *Vibrio cholerae*<sup>29</sup>.  
117 *E. coli* SlmA binds to dozens of motifs (SBSs) distributed throughout the chromosome  
118 except in the terminus (*ter*) region<sup>30,31</sup>. In a mechanism termed Nucleoid Occclusion  
119 (NO), SlmA-SBS complexes inhibit cell division locally by disrupting polymerization of

120 FtsZ<sup>30,31</sup>. By restricting SlmA activity to sites of SBS enrichment, *E. coli* effectively  
121 inhibits the formation of Z-rings over the bulk nucleoid while at the same time permitting  
122 Z-ring assembly in the midcell-localized *ter* region. In this way, SlmA utilizes the  
123 chromosome as a landmark to spatially regulate its FtsZ-inhibitory function.

124 In addition to NO, *E. coli* utilizes at least two other systems to ensure Z-rings  
125 only assemble at midcell, between replicated chromosomes. The Min system, alluded  
126 to above for *B. subtilis*, inhibits FtsZ polymerization in nucleoid-free regions near the  
127 poles<sup>32</sup>. More recently, ZapA, ZapB, and the DNA-binding protein MatP were shown to  
128 act in the *ter*-proximal region to promote midcell Z-ring formation<sup>33,34</sup>. Given that  
129 reproduction requires the faithful inheritance of intact genomes by progeny, it is not  
130 surprising that multiple mechanisms have evolved to ensure chromosomes are faithfully  
131 partitioned at the time of cell division.

132 Like *E. coli*, *B. subtilis* also possesses a NO system to prevent cell division over  
133 the bulk nucleoid<sup>35,36</sup>. The NO system of *B. subtilis* is comprised of a DNA-binding  
134 protein, Noc, and its cognate binding sites (NBSs), which are also distributed  
135 throughout the chromosome except with a notable gap in the *ter* region<sup>36</sup>. In contrast to  
136 SlmA, evidence for a direct interaction between Noc and FtsZ is currently lacking.  
137 Instead, Noc-NBS complexes associate with the cell envelope, where they are  
138 hypothesized to perturb the association and/or nucleation of FtsZ filaments at the  
139 membrane<sup>27</sup>.

140 Establishing and maintaining subcellular organization is important, but cells must  
141 also be poised to dynamically reconfigure their overall organization in response to  
142 changing growth contexts. For example, during *B. subtilis* sporulation, several major

143 morphological changes must occur to facilitate spore formation. The cell's two  
144 chromosomes are stretched from pole to pole in an elongated *oriC-ter-oriC*  
145 configuration called the axial filament<sup>37,38</sup>. In addition, there is a dramatic adjustment in  
146 the location of cell division. FtsZ shifts from midcell toward a cell quarter and directs  
147 septation over one chromosome. During sporulation, Z-ring inhibition imposed by both  
148 the Min and NO systems at the cell pole must be relieved. Alleviation of Min inhibition  
149 may be facilitated by the repositioning of MinD (required to mediate MinC-dependent  
150 inhibition of FtsZ) to the distal cell pole<sup>39</sup>. Regarding NO, it has been proposed that the  
151 axial filament may be arranged such that relatively few Noc-binding sites are positioned  
152 at the site of incipient septation<sup>36</sup>.

153         The shift of FtsZ from midcell toward the pole is promoted by increased levels of  
154 FtsZ<sup>40,41</sup> and expression of a membrane-associated sporulation protein, SpoIIIE<sup>42,43</sup>.  
155 Following septation, the larger mother cell possesses an entire chromosome, whereas  
156 the forespore initially contains only one-quarter to one-third of the second  
157 chromosome<sup>18,38</sup>. The genetic asymmetry between the mother cell and forespore is  
158 critical for differentiation<sup>44,45</sup> and the region captured is reproducible<sup>18,38</sup>. The  
159 chromosome is not bisected during polar division because SpoIIIE, a DNA translocase  
160 localized to the edge of the septum<sup>46</sup>, assembles around the chromosomal arms<sup>26,47</sup>.  
161 Since the chromosome is threaded through the septum, SpoIIIE must directionally  
162 pump the remainder from the mother cell into the forespore for development to  
163 progress. To avoid chromosome breakage during septation, capture a reproducible  
164 region of DNA in the forespore, and pump the forespore-destined chromosome in the  
165 correct direction, there must be coordination between cell division proteins, SpoIIIE,

166 and the chromosome. How this coordination is orchestrated at the molecular level  
167 largely remains a mystery.

168         Precise division over and capture of the forespore-destined chromosome  
169 requires RefZ, a TetR family DNA-binding protein conserved across the *Bacillus*  
170 genus<sup>48,49</sup>. RefZ expression is activated early in sporulation, first via the stationary  
171 phase sigma factor,  $\sigma^H$ <sup>50</sup> and then by Spo0A~P, the activated form of the sporulation  
172 master response regulator<sup>51,52</sup>. RefZ binds to five nearly palindromic DNA motifs  
173 (*RBM*s), two on each chromosomal arm and one near *oriC*<sup>48,49</sup>. The *RBM*s on the left  
174 and right arms delineate the boundary between chromosomal regions present in the  
175 forespore and mother cell at the time of septation. Chromosomal regions immediately  
176 adjacent to each *RBM* localize near the incipient site of polar cell division, suggesting a  
177 possible role in division or organization of the chromosome near the sporulation  
178 septum<sup>48</sup>. Consistent with this idea, the *RBM*s are required for precise capture of the  
179 forespore-destined chromosome<sup>48</sup>. Strikingly, the relative position of the *RBM*s with  
180 respect to *oriC* is conserved across the entire *Bacillus* genus. This evolutionary  
181 conservation strongly suggests that the location of the *RBM*s is functionally important  
182 and provides a considerable selective advantage to the genus<sup>48</sup>.

183         In addition to imprecise chromosome capture, perturbation of RefZ activity is  
184 associated with two other phenotypes: first, during sporulation a  $\Delta refZ$  mutant is  
185 modestly delayed in assembly of polar Z-rings<sup>49</sup>. Second, artificially induced  
186 expression of RefZ during vegetative growth disrupts Z-ring assembly and inhibits cell  
187 division. RefZ-DNA complexes are likely required to disrupt Z-rings, as RefZ DNA-  
188 binding mutants no longer disrupt cell division<sup>49</sup>. These data, and the fact that RefZ



189 and SlmA are both TetR family proteins led us to hypothesize that *RBM*-bound RefZ  
190 complexes might act as a developmentally regulated NO system that tunes FtsZ  
191 dynamics and/or Z-ring positioning relative to the chromosome.

192 To test this hypothesis, we isolated and characterized 10 RefZ loss-of-function  
193 (rLOF) variants unable to inhibit cell division when misexpressed during vegetative  
194 growth, yet still capable of binding *RBM*s. None of the rLOF variants were able to  
195 support wild-type chromosome capture when expressed from the native promoter  
196 during sporulation, and instead phenocopied a  $\Delta refZ$  mutant. These results are  
197 consistent with a model in which RefZ mediates precise chromosome capture by  
198 modulating FtsZ activity. To better understand the molecular basis of RefZ's activity,  
199 wild-type RefZ and the rLOF variants were overexpressed, purified, and structural and  
200 biochemical characterizations were carried out. The location of the rLOF substitutions  
201 on the RefZ crystal structure suggests that RefZ affects FtsZ through a mechanism that  
202 is distinct from that described for SlmA. Characterization of the rLOF variants indicates  
203 that specificity for *RBM*-containing DNA and RefZ's propensity to dimerize are critical  
204 determinants in governing RefZ's effect on cell division and precise capture of  
205 forespore chromosome *in vivo*.

206

## 207 **Results**

208

### 209 ***Identification of RefZ residues important for inhibition of cell division***

210 Misexpression of RefZ during vegetative growth disrupts Z-ring formation and  
211 inhibits cell division, resulting in filamentation. The division inhibition phenotype can be  
212 suppressed in strain backgrounds harboring specific mutations in *ftsZ* or a second copy

213 of the *ftsAZ* operon<sup>49</sup>. Division inhibition appears to require RefZ's DNA binding activity,  
214 as RefZ variants harboring substitutions in the DNA recognition helix (Y43A and Y44A)  
215 do not filament cells following misexpression<sup>49</sup>. DNA binding is also likely required for  
216 RefZ's role in chromosome capture, as a strain harboring point mutations in the five  
217 *oriC*-proximal RefZ binding motifs (*RBM*<sub>5mu</sub>) exhibits the same capture defect as a  
218  $\Delta refZ$  mutant<sup>48</sup>. Based on these data, we hypothesized that RefZ associates with *RBM*s  
219 to modulate FtsZ dynamics in the vicinity of the incipient septum and that this  
220 modulation would be required for ensuring precise chromosome capture.

221 To test whether RefZ's ability to inhibit cell division is required to support precise  
222 chromosome capture, we designed a two-stage genetic selection-screen to isolate RefZ  
223 loss-of-function (rLOF) variants capable of binding to the *RBM*s, but unable to disrupt  
224 cell division upon misexpression (Fig 1). Gibson assembly<sup>53</sup> was used to generate a  
225 library of linear misexpression constructs comprised of an IPTG-inducible promoter  
226 (*P<sub>hy</sub>*), randomly mutagenized *refZ* sequences (*refZ*<sup>\*</sup>), a selectable marker (*spec*<sup>R</sup>) and  
227 regions of homology to direct double crossover integration of the linear DNA at a non-  
228 essential locus (*amyE*)(Fig 1A). To select for rLOF mutants, we took advantage of the  
229 fact that in a sensitized background ( $\Delta minD$ ), expression of wild-type *refZ* from an  
230 IPTG-inducible promoter prevents colony formation on solid medium, whereas  
231 expression of RefZ variants unable to inhibit cell division survive<sup>49</sup>. In addition to *minD*,  
232 the native *refZ* gene was also deleted to ensure that the only RefZ expressed would be  
233 from the inducible promoter.

234 To eliminate variants unable to bind DNA, survivors of the selection were  
235 screened for *RBM*-binding activity using a RefZ-repressible, *lacZ* transcriptional fusion  
236 ( $P_{spremo}$ -*lacZ*) integrated at the non-essential *sacA* locus.  $P_{spremo}$  harbors a single *RBM*  
237 ( $RBM_{L2}$ )<sup>48</sup> inserted between the -35 and -10 elements of a constitutive promoter (Fig  
238 1A). In this background, rLOF variants that can bind the engineered *RBM* operator  
239 repress *lacZ* expression and produce white colonies on media containing X-gal. In  
240 contrast, rLOF variants unable to bind the *RBM* due to decreased affinity for the *RBM*,  
241 poor expression, truncation, or misfolding produce blue colonies, allowing them to be  
242 excluded from further investigation.

243 To facilitate selection and screening efficiency and avoid cloning steps,  
244 transformation conditions were optimized so that the mutant *refZ* misexpression  
245 construct library could be directly introduced into the *B. subtilis* chromosome (see  
246 Methods). RefZ loss-of-function and double-crossover integration were selected for  
247 simultaneously by plating transformations on a medium containing both spectinomycin  
248 and IPTG.

249 Approximately 1,300 viable transformants were obtained, 37 of which were either  
250 white or pale blue on medium containing X-gal and IPTG, consistent with rLOF  
251 repression of *lacZ* expression from the engineered *RBM* operator. Since resistance to  
252 RefZ can also be conferred by spontaneous suppressor mutations in *ftsZ*<sup>49</sup>, the 37  
253 misexpression constructs were transformed into a clean selection-screen background,  
254 and survival and *RBM*-binding were reassessed. Four candidates failed to survive on  
255 IPTG plates, suggesting the presence of suppressor mutations in the original strains,  
256 while an additional four turned blue on X-gal indicator medium.

257 To identify rLOF mutations in the remaining 29 candidates, the  $P_{hy-rLOF}$  region  
258 was amplified from the genomic DNA and sequenced. Ten unique single-point  
259 mutations were identified, corresponding to the 10 rLOF substitutions shown in Figure  
260 1B. In contrast to wild-type RefZ, misexpression of the rLOF variants did not result in  
261 cell filamentation (Fig 1C), consistent with a loss of ability to affect FtsZ. The inability of  
262 rLOF variants to inhibit cell division was not anticipated to be attributable to protein  
263 misfolding or insufficient expression, as each variant was able to repress *lacZ*  
264 expression from the *RBM* operator in the primary screen (Fig 1B). Consistent with this  
265 conclusion, Western blot analysis of the rLOF variants demonstrated that they are  
266 stably expressed and present at levels comparable to wild-type RefZ following  
267 misexpression (Fig 1D). From these data we conclude that the 10 rLOF variants are  
268 perturbed in their ability to affect FtsZ function, either directly or indirectly.

269

### 270 ***rLOF mutants miscapture the forespore chromosome***

271 A  $\Delta refZ$  mutant and a strain harboring point mutations in all five *oriC*-proximal  
272 *RBM*s (*RBM<sub>5mu</sub>*) both exhibit a 2-fold increase in the frequency of left and right arm  
273 reporter capture compared to wild-type controls<sup>48</sup>. We hypothesized that if RefZ's  
274 ability to perturb FtsZ assembly is required to mediate precise chromosome capture,  
275 then the rLOF mutants would phenocopy the  $\Delta refZ$  mutant with regard to chromosome  
276 trapping. To test this hypothesis, chromosome organization was monitored in  
277 sporulating cells expressing the rLOF variants from the native locus (native promoter)  
278 using a fluorescence-based trapping assay<sup>18,48</sup>. For each strain, the native *refZ* gene  
279 was replaced with a rLOF mutant sequence in backgrounds harboring reporters for

280 either left ( $-61^\circ$ ) or right ( $+51^\circ$ ) arm capture (Fig 2). All of the rLOF mutations resulted  
281 in significant increases in both left and right arm reporter capture compared to wild-type  
282 controls ( $P < 0.05$ ) (Fig 2). Moreover, with the exception of right arm capture in the  
283 R116S mutant, miscapture of both left and right arm reporters in the rLOF mutants was  
284 statistically indistinguishable from the  $\Delta refZ$  controls ( $P > 0.05$ ). The right arm reporter in  
285 the R116S mutant exhibited an intermediate capture defect that was statistically  
286 different from both  $\Delta refZ$  ( $P = 3.9 \times 10^{-3}$ ) and wild-type ( $P = 2.3 \times 10^{-3}$ ). The intermediate  
287 capture defect observed in the R116S mutant suggests this variant retains some  
288 functionality, and is consistent with the reduced growth we observed on selection  
289 medium in the sensitized  $\Delta minD$  background (Fig 1B). These data demonstrate that the  
290 same residues required for RefZ's ability to inhibit division upon misexpression are also  
291 required for precise chromosome capture, and are consistent with a model in which  
292 RBM-bound RefZ modulates FtsZ activity to position the polar septum relative to the  
293 chromosome.

294

### 295 **Structural characterization of RefZ**

296 Like the *E. coli* NO protein, SlmA, RefZ belongs to the TetR family of DNA-binding  
297 proteins<sup>49</sup>. At the sequence level, RefZ and SlmA share no significant similarity. We  
298 reasoned that structural characterization of RefZ and mapping of the rLOF substitutions  
299 to the RefZ structure would not only provide insight into how RefZ functions, but also  
300 allow for comparison to what is known about SlmA's mechanism of FtsZ inhibition.  
301 RefZ-His6 was purified, crystallized, and the structure was solved using single-  
302 wavelength anomalous dispersion (SAD) phasing at a resolution of 2.6 Å. RefZ

303 crystallized as a homodimer (Fig 3A) with one molecule in the asymmetric unit of a  
304 P4<sub>1</sub>2<sub>1</sub>2 crystal lattice. The model for residues 1-200 was built and refined with R<sub>work</sub>=  
305 22% and R<sub>free</sub>= 25% (Table 1). Each RefZ subunit is composed of 10  $\alpha$ -helices  
306 connected by loops and turns, with  $\alpha$ 1,  $\alpha$ 2, and  $\alpha$ 3 comprising the DNA binding helix-  
307 turn-helix (HTH) domain and  $\alpha$ 4- $\alpha$ 10 comprising the regulatory domain (Fig 3A), similar  
308 to other structurally characterized TetR family proteins<sup>54</sup>. There are two major regions  
309 for dimerization contacts. Helices  $\alpha$ 7,  $\alpha$ 8,  $\alpha$ 9, and  $\alpha$ 10 form regulatory domain contacts  
310 with  $\alpha$ 7',  $\alpha$ 8',  $\alpha$ 9', and  $\alpha$ 10', with  $\alpha$ 8,  $\alpha$ 10,  $\alpha$ 8' and  $\alpha$ 10' forming a four-helix dimerization  
311 motif (Fig 3B). A second interface is formed by  $\alpha$ 6 and  $\alpha$ 6', at the junction between the  
312 regulatory and DNA binding domains (Fig 3A). Although the crystallization condition  
313 included *RBM*-containing DNA, we observed no DNA in the crystal structure. In fact, the  
314 HTH DNA binding domain is involved in extensive crystal packing interactions, likely  
315 precluding DNA binding within the crystal lattice.

316 According to a structural similarity search using VAST<sup>55</sup>, RefZ shares the highest  
317 homology with PfmR from *Thermus thermophilus* (PDB: 3VPR)<sup>56</sup>, with a VAST similarity  
318 score of 15.4, closely followed by KstR2 of *Mycobacterium tuberculosis* (PDB: 4W97)<sup>57</sup>,  
319 with a score 15.2. The SlmA structure (PDB: 4GCT)<sup>58</sup> was the tenth closest in similarity  
320 with a score of 13.6. Superposition of SlmA and RefZ produced a root-mean-square  
321 deviation (rmsd) in C $\alpha$  of 2.8.

322 RefZ's HTH domain (residues 1-45) has the highest contiguous alignment similarity  
323 score with QacR from *Staphylococcus aureus* (PDB: 1JT6)<sup>59</sup>, with a VAST similarity  
324 score of 4.0 and a rmsd value of 0.7. Superimposition of the HTH domains  
325 demonstrates the structures align closely (S1A Fig). However, when the RefZ dimer is

326 superimposed with DNA-bound QacR (PDB: 1JT0), it is apparent that the RefZ dimer  
327 would need to undergo a conformational change for the  $\alpha 3$  and  $\alpha 3'$  helices to be  
328 accommodated in adjacent DNA major grooves (S1B Fig and S1C Fig).

329 DNA binding in TetR family proteins can be allosterically regulated by ligand binding  
330 in a pocket formed by  $\alpha 5$ ,  $\alpha 6$ , and  $\alpha 7$ . For QacR, ligand binding results in a pendulum  
331 motion of  $\alpha 4$  that repositions the HTH domains such that the distance between  $\alpha 3$  and  
332  $\alpha 3'$  becomes incompatible with DNA binding<sup>60</sup>. In the RefZ structure (unbound from  
333 DNA), there is no obvious ligand binding pocket in the  $\alpha 5$ - $\alpha 7$  regulatory region,  
334 suggesting RefZ's affinity to DNA is unlikely to be regulated by ligand binding in this  
335 region. At the same time, we do not exclude the possibility that a pocket may exist  
336 when RefZ is bound to DNA.

337

### 338 ***The regions of RefZ and SImA important for inhibiting cell division are distinct***

339 To analyze which regions of RefZ are important for its effect on cell division, and  
340 compare them to the location of the loss-of-function residues identified for SImA, the  
341 residues with rLOF substitutions were mapped to the RefZ crystal structure (Fig 4).  
342 Nine of the 10 rLOF substitutions (L153R being the exception) occur in charged  
343 residues that are surface exposed and map to the same surface of the RefZ homodimer  
344 (Fig 4A and 4B). L153 maps to the dimerization interface (Fig 5A) and participates in  
345 several hydrophobic interactions between subunits that are likely important for RefZ  
346 dimerization. Residue R102 is not only surface exposed, but also hydrogen bonds  
347 across the dimer interface to the backbone carbonyl of V108' ( $\text{NH}_2\text{-O} = 2.6 \text{ \AA}$ )(Fig 5B).

348 To assess if similar regions of SlmA were implicated in FtsZ regulation, the  
349 structures of the RefZ and SlmA homodimers were compared (Fig 4). SlmA binds the  
350 C-terminal domain tail of FtsZ along a hydrophobic groove located between  $\alpha 4$  and  
351  $\alpha 5$ <sup>29,30</sup>. SlmA loss-of-function substitutions map to this region clustering primarily along  
352  $\alpha 4$  (Fig 4C and 4D)<sup>29,61</sup>. In contrast, the surface-exposed residues implicated in RefZ  
353 loss of function are positioned both at or on either side of the RefZ dimerization  
354 interface and all but L153 are positively or negatively charged (Fig 4A). From these  
355 data we conclude that if RefZ regulates FtsZ through direct interaction, then the precise  
356 mechanism is likely to differ significantly from that described for SlmA.

357

### 358 ***Characterization of RefZ and rLOF variant DNA-binding***

359 RefZ's ability to inhibit cell division is dependent upon DNA binding<sup>49</sup>. We  
360 predicted that the rLOF variants would be DNA-binding proficient because each was  
361 able to repress *lacZ* expression from an *RBM* operator in the *in vivo* screening assay  
362 (Fig 1B); however, *RBM*-binding in the *in vivo* assay was qualitative and not designed  
363 to differentiate between specific and non-specific DNA interactions. To directly  
364 examine the behavior of the variants with DNA, we overexpressed and purified each of  
365 the rLOF variants (S2 Fig) and performed electrophoretic mobility shift assays (EMSAs)  
366 with wild-type and mutant *RBM* DNA probes as described previously<sup>48</sup>. Incubation of  
367 wild-type RefZ with a 150 bp *RBM*-containing probe produced two major mobility shifts  
368 (Fig 6), corresponding to RefZ binding to *RBM*-containing DNA in units of two and four.  
369 Consistent with previous observations<sup>48</sup>, the upshifts were lost when RefZ was  
370 incubated with a mutant *RBM* probe (harboring seven point-mutations in the central



371 palindrome) suggesting that DNA binding is shows specificity for the *RBM* sequence  
372 (Fig 6). Four of the rLOF variants (R116S, R116W, E117D, and E179K) produced  
373 specific upshifts similar to wild-type RefZ, suggesting that their loss-of-function  
374 phenotypes are not attributable to altered affinity or non-specific DNA binding.

375

376         The remaining variants exhibited altered DNA interactions with respect to either  
377 specificity and/or mobility shift pattern. Two variants (E53K and E61K) exhibited a  
378 laddering pattern, possibly due to additional subunits of RefZ binding nonspecifically  
379 along the DNA (Fig 6). These variants also shifted a mutant *RBM*, consistent with  
380 enhanced nonspecific binding. E53K and E61K may assume conformations more  
381 favorable for nonspecific DNA binding since the substitutions are located on  $\alpha 4$ , a helix  
382 important for modulating DNA interaction in response to ligand binding in other TetR  
383 family members<sup>62</sup>. Although the laddering behavior was most extensive with E53K and  
384 E61K mutants, wild-type RefZ is also observed to ladder slightly (Fig 6). The laddering  
385 behavior is more apparent when the EMSA gels are run at a higher voltage (200 V vs.  
386 150 V)(S3A Fig), likely because EMSAs are non-equilibrium assays and the faster run  
387 time reduces RefZ disassociation. E117G also produced laddering, albeit to a lesser  
388 extent than either E53K or E61K (Fig 6). The remaining variants, R102C, R102S, and  
389 L153R, each possess substitutions in residues that make dimerization contacts (Fig 5).  
390 R102C, R102S and L153R produced two major upshifts, but were unable to ladder on  
391 DNA even under EMSA conditions in which wild-type RefZ displayed some laddering  
392 (S3B Fig).

393 To determine if there were quantitative differences in DNA binding that might  
394 account for the loss-of-function phenotypes, we determined the dissociation constant  
395 ( $K_d$ ) of wild-type RefZ and each of the rLOF mutants for a 41 bp segment of *RBM*-  
396 containing DNA using bio-layer interferometry. The *RBM*-containing DNA, which was 5'  
397 biotinylated, was immobilized on a streptavidin sensor. The association and  
398 dissociation of wild-type RefZ (S3 Fig) and the rLOF variants was then assessed by  
399 monitoring the change in thickness of the bio-layer. All of the rLOF variants displayed  
400  $K_d$  values within 2-fold of wild type (Fig 6). The decreased  $K_d$  for the L153R mutant was  
401 most significant ( $P < 0.01$ ), consistent with the reduced apparent affinity for DNA  
402 observed by EMSA (Fig 6). These results suggest that the *in vivo* chromosome capture  
403 defect observed in strains harboring rLOF mutations (Fig 2), with the possible exception  
404 of L153R, are unlikely attributable to markedly reduced affinity for DNA.

405

#### 406 ***RefZ oligomerization state by size-exclusion chromatography***

407 Three of the rLOF substitutions (R102C, R102S, and L153R) map to residues  
408 implicated in RefZ dimerization based on structural analysis (Fig 5), suggesting  
409 dimerization may be important for RefZ's effect on cell division. Purified TetR proteins  
410 have been shown to exist as both monomers and dimers in solution and as pairs of  
411 dimers on DNA<sup>31,62-65</sup>. RefZ also binds DNA in units of two and four<sup>48</sup>, but its  
412 oligomerization state in the absence of DNA is unknown. To determine the  
413 oligomerization state of purified RefZ and the rLOF variants, we performed size-  
414 exclusion chromatography. Wild-type RefZ-His6 eluted from a Superdex 200 column  
415 primarily as a single peak corresponding to an apparent molecular weight of 21 kDa,

416 close to the actual monomeric molecular weight of 25.4 kDa (Fig 7A and S4 Fig). A  
417 minor peak, corresponding to an aggregate or higher-order oligomer, was also  
418 observed (S4 Fig). All of the rLOF variants tested displayed elution profiles comparable  
419 to wild type (Fig 7A). These data indicate that if RefZ forms dimers in the absence of  
420 DNA, then these dimers are not stable enough to be maintained during size-exclusion  
421 chromatography.

422

### 423 ***Bacterial two-hybrid analysis of RefZ self-interaction***

424 Size-exclusion chromatography is known to disassociate weaker oligomers,  
425 including dimers of at least one TetR family protein<sup>60</sup>. Therefore, to further investigate if  
426 any of the rLOF substitutions altered RefZ's ability to form dimers, we performed  
427 bacterial 2-hybrid (B2H) analysis<sup>66</sup>. In the B2H assay, wild-type RefZ displayed a self-  
428 interaction that was not observed in the negative controls (Fig 7B). The self-interaction  
429 is unlikely to require *RBM* binding, as the B2H assay is performed in an *E. coli* strain  
430 that lacks native *RBM* motifs. Consistent with this observation, a DNA-binding deficient  
431 variant, Y43A<sup>49</sup>, displayed self-interaction similar to wild type (Fig 7B). The B2H is most  
432 likely reporting on dimerization as the RefZ forms a homodimer in the crystal structure  
433 (Fig 3A). To explore this possibility further, we introduced a substitution at the  
434 dimerization interface predicted to disrupt hydrogen bonding between RefZ subunits.  
435 Substitution of an alanine at R106, an invariant residue in *Bacillus refZ* homologs that  
436 participates in two hydrogen bond contacts across the dimer interface (four bonds  
437 total)(Fig 5B), resulted in the reduced self-interaction as expected (Fig 7B).

438 B2H analysis of the 10 rLOF variants revealed three classes of self-interaction  
439 phenotypes: loss-of-interaction, gain-of-interaction, and wild-type interaction. Three  
440 rLOF variants, L153R, R102C, and R116W classed as loss-of-interaction. Like R106,  
441 R102 and L153 are located on the dimer interface. R102 contributes a total of two  
442 hydrogen bonds to RefZ dimer formation (Fig 5B). Substitution of a cysteine at R102  
443 would therefore be expected to reduce dimerization and this is consistent with the  
444 reduced self-interaction observed (Fig 7B). The L153R substitution introduces a longer,  
445 positively charged side chain into a hydrophobic region of the RefZ dimer interface, and  
446 thus is also predicted to reduce dimerization (Fig 5A). No self-interaction was observed  
447 for the L153R variant, consistent with the structural prediction. These data suggest that  
448 the loss-of-function phenotypes of R102C and L153R may be related to a reduced  
449 ability to dimerize.

450 Three variants, E53K, R116S, and E179K displayed enhanced self-interaction  
451 compared to wild type (Fig 7B). E53K is positioned on  $\alpha 4$ , the helix connecting the  
452 regulatory domain ( $\alpha 4$ - $\alpha 10$ ) to the DNA-binding domain ( $\alpha 1$ - $\alpha 3$ ). In TetR and QacR,  
453 conformational changes caused by ligand binding to the regulatory domain are  
454 transmitted through  $\alpha 4$  to the HTH, leading to DNA release<sup>62</sup>. Since the E53K mutant  
455 also shows higher affinity for non-specific DNA (Fig 6), we hypothesize that E53K  
456 facilitates a conformation that both dimerizes and binds DNA more readily. Given that  
457 the R116S and R116W variants display opposite phenotypes (enhanced and weakened  
458 self-interaction, respectively), R116 clearly has an important role in determining RefZ's  
459 dimerization state. The E179K substitution is located just proximal to  $\alpha 8$ , a helix that  
460 participates in hydrophobic interactions between RefZ subunits (Fig 3B). The E179K

461 substitution may cause a change in RefZ's overall conformation that enhances  
462 hydrophobic interactions between helices  $\alpha 8$  and  $\alpha 8'$  of the RefZ subunits.

463 Four variants, R102S, E61K, E117D, and E117G, exhibited self-interaction  
464 comparable to wild type (Fig 7B). Notably, even though the R102S and E117D  
465 substitutions support wild-type self-interaction (Fig 7B) and *RBM* binding (Fig 6), they  
466 are not functional *in vivo*. These results suggest that R102 and E117 are perturbed in  
467 functions not revealed by the *ex vivo* assays. At the same time, six of the 10 rLOF  
468 variants display either reduced or increased self-interaction, suggesting that the ability  
469 of RefZ to switch between monomer and dimer forms is likely important for the  
470 mechanism leading to FtsZ inhibition.

471

#### 472 ***Thermostability of RefZ and the rLOF variants***

473 To examine the effect of the rLOF substitutions on RefZ's thermostability, we  
474 performed differential scanning fluorimetry (DSF). Wild-type RefZ displayed a single  
475 transition melting curve (S5 Fig, WT), with a melting temperature ( $T_m$ ) of 39°C (Fig 7C).  
476 With the exception of R116W, all of the variants displayed single transition melting  
477 curves (S5 Fig). Most of the variants exhibited a lower  $T_m$  compared to wild type  
478 (L153R<R102C<R116S<R102S<WT). Notably, L153R and R102C were the most  
479 destabilized (-5°C and -4°C, respectively) and also showed the weakest self-interaction  
480 in the B2H (Fig 7B). Conversely, E53K was more thermostable than wild type and also  
481 displayed the most self-interaction by B2H (Fig 7C). R116W also displayed reduced  
482 thermostability and self-interaction; however, unlike L153R and R102C, the R116W  
483 melting curve displayed two transitions, suggesting that the R116W variant assumes

484 more than one conformation in solution. These results suggest that RefZ and the rLOF  
485 variants may assume multiple conformations in solution, and that RefZ's  
486 oligomerization state may be partly reflected in the thermostability measurements.

487

## 488 **Discussion**

489 RefZ is required for the timely redistribution of FtsZ from midcell to the pole<sup>49</sup>.  
490 RefZ can also inhibit Z-ring assembly and filament cells when it is artificially induced  
491 during vegetative growth, an activity that requires DNA binding<sup>49</sup>. Under its native  
492 regulation, RefZ is expressed early in sporulation and requires the *RBM*s to facilitate  
493 precise capture of the chromosome in the forespore<sup>48</sup>. Together, these results suggest  
494 that RefZ's effect on FtsZ, whether direct or indirect, is regulated by interactions with  
495 the nucleoid. Strikingly, the *RBM*s and their relative positions on the chromosome with  
496 respect to *oriC* are conserved across the entire *Bacillus* genus, indicating there is  
497 strong selective pressure to maintain the location of the *RBM*s. In *B. subtilis*, the *RBM*s  
498 are positioned in the cell near the site of polar septation. These observations, and the  
499 fact that RefZ, like SlmA (the NO protein of *E. coli*) belongs to the TetR family of DNA-  
500 binding proteins led us to hypothesize that RefZ binds to the *RBM*s to tune Z-ring  
501 positioning relative to the chromosome during sporulation.

502 To determine if RefZ's FtsZ-inhibitory activity was important for chromosome  
503 capture, we took advantage of RefZ's vegetative misexpression phenotype  
504 (filamentation and cell killing in a sensitized background) to isolate 10 rLOF variants  
505 capable of binding DNA, but unable to inhibit FtsZ. All 10 of the rLOF variants were  
506 unable to support correct chromosome capture (Fig 2), consistent with a model in which

507 RefZ-RBM complexes act through FtsZ to facilitate precise septum placement with  
508 respect to the chromosome during polar division. This model is also supported by  
509 recent evidence showing that on average,  $\Delta refZ$  mutants position Z-rings approximately  
510 15% further away from the cell pole compared to the wildtype<sup>67</sup>.

511

### 512 *RefZ and SlmA do not inhibit FtsZ through a common mechanism*

513 To better understand RefZ's mechanism of action at the molecular level, wild-  
514 type RefZ and the rLOF variants were overexpressed, purified, and analyzed using  
515 structural and biochemical approaches (summarized in Table 2). The RefZ crystal  
516 structure revealed that RefZ is capable of forming a homodimer (Fig 3), similar to other  
517 TetR proteins, including SlmA. The relative locations and nature of the loss-of-function  
518 substitutions in RefZ and SlmA are different (Fig 4), suggesting that if RefZ interacts  
519 with FtsZ directly, then RefZ's mechanism of action is distinct from that of SlmA. At  
520 least some mechanistic differences would be expected, as the C-terminal tails of FtsZ  
521 from *B. subtilis* and *E. coli* are distinct. More specifically, while the portion of *E. coli*  
522 FtsZ observed to interact with SlmA in the co-crystal is relatively conserved (DIPAFRLR  
523 in *E. coli* and DIPTFLR in *B. subtilis*), the remainder of the C-termini differ significantly  
524 (KQAD in *E. coli* and NRNKRG in *B. subtilis*).

525

### 526 *The role of self-interaction and RBM-binding in RefZ function*

527 An important finding of this study is that both enhanced and reduced RefZ  
528 dimerization are correlated with loss-of-function phenotypes *in vivo*. B2H analysis  
529 indicates that the majority of rLOF variants (6/10) exhibited either stronger or weaker

530 self-interaction (Fig 7B), suggesting that RefZ's propensity to switch between a  
531 monomer and dimer states is integral to affecting FtsZ function. Two rLOF variants  
532 (R102C and L153R) possess substitutions predicted to disrupt dimerization (Fig 5), a  
533 result corroborated by B2H analysis (Fig 7B). L153R also causes a 2-fold reduction in  
534 affinity for *RBM*-containing DNA, which could affect its ability to appropriately localize to  
535 *RBM*s *in vivo*.

536 Two rLOF variants (E53K and E61K) are located on  $\alpha 4$ . Based on the  
537 observation that E53K and E61K exhibit enhanced laddering and an increased  
538 apparent affinity for nonspecific DNA by EMSA (Fig 6), we propose that these variants  
539 assume a conformation that is more favorable for nonspecific DNA-binding than that  
540 assumed by wild type. *In vivo*, enhanced nonspecific binding would reduce the  
541 formation of RefZ-*RBM* complexes, which prior data suggest is the functional form of  
542 RefZ<sup>48,49</sup>.

543 The ability of RefZ to generate DNA laddering in EMSAs (Fig 6 and S3 Fig) is  
544 presumably due to the association of additional RefZ subunits to adjacent DNA after the  
545 initial pair of dimers binds the *RBM*<sup>48</sup>. Other TetR proteins, including SImA, have also  
546 been observed to “spread” on DNA *in vitro*<sup>58,63,68</sup>. In the case of SImA, spreading on  
547 DNA is hypothesized to facilitate interaction with the exposed C-terminal tails of FtsZ to  
548 promote filament breakage<sup>58</sup>. Although genetic and cell biological data suggest RefZ  
549 and FtsZ interact<sup>48,49,67</sup>, evidence for direct interaction between RefZ and FtsZ is  
550 lacking. Attempts to test for RefZ-FtsZ interaction *in vitro* have been impeded by RefZ's  
551 limited solubility outside of the specific conditions identified in this study. Therefore, the  
552 precise mechanism by which RefZ affects FtsZ remains to be determined.



553           One of the most interesting observations obtained from characterizing the rLOF  
554 variants is that the R116S and R116W substitutions on the first turn of  $\alpha 7$  result in  
555 opposite self-interaction phenotypes (Fig 7B). Both variants behave comparably with  
556 regard to affinity and specificity for the *RBM*-containing DNA (Fig 6), suggesting the  
557 loss-of-function phenotypes are not attributable to differences in DNA interaction or  
558 protein misfolding. Instead, these results suggest that R116 is a key residue in  
559 determining the stability of the RefZ dimer. We hypothesize that R116 participates in  
560 intramolecular bonds with residues within a flexible loop region (between  $\alpha 6$  and  $\alpha 7$ ,  
561 residues 109-114)(Fig 3A), possibly contributing to the formation of a more stable  
562 homodimer. R116 could participate in formation of either ionic or hydrogen bonds with a  
563 invariant aspartate residue (D111) located in the flexible loop. Our ability to assess  
564 R116's role in intramolecular bond formation is limited in the current crystal structure,  
565 as the electron density for the R116 side-chain is not well defined. Moreover, the  
566 electron density for the main chain of the flexible loop is moderately disordered,  
567 showing peaks of positive  $F_o - F_c$  electron density next to the I110 and D111 side-  
568 chains.

569           R116 is also immediately adjacent to E117, another critical residue identified in  
570 this study. E117D is the only rLOF variant that is loss of function with regard to  
571 inhibiting cell division and capturing the forespore chromosome, yet is not detectably  
572 altered in the other RefZ properties implicated in function (Table 2). If RefZ targets FtsZ  
573 directly, then these data point toward E117 as a likely candidate residue for mediating  
574 interaction. The E117D substitution is intriguing because the glutamate to aspartate  
575 change is highly conservative; however, if the interaction is direct, the shorter sidechain

576 of the aspartate could compromise RefZ's ability to target FtsZ. It has not escaped our  
577 attention that many regulators of FtsZ including FtsA, ZapD, and MinD possess  
578 glutamate or aspartate residues near the implicated FtsZ C-terminal tail binding site  
579 which are preceded by either a hydrophobic or polar uncharged residue followed by  
580 an arginine or lysine. For example, FtsA from *Thermotoga maritima* possesses LRE<sup>69</sup>,  
581 ZapD from *E. coli* and a variety of Gammaproteobacteria I(R/K)E<sup>70,71</sup>, and MinD a  
582 highly conserved ARD<sup>72</sup>. Whether these residues represent a *bona fide* motif involved  
583 in FtsZ regulation remains to be determined, but it is intriguing that two residues  
584 identified as critical for RefZ function fall within an IRE sequence.

585

#### 586 *Working model for RefZ-mediated septum positioning*

587         Based on the data available, we propose a model in which RefZ mediates  
588 chromosome capture by fine-tuning the position of FtsZ assembly over the forespore-  
589 destined chromosome. In our model, RefZ is primed to inhibit FtsZ polymerization near  
590 the pole by binding specifically to the polarly-localized *RBM*s. Based on structural  
591 studies of other TetR family proteins and the observation that RefZ binds to *RBM*s in  
592 units of two and four *in vitro*<sup>48,49</sup>, RefZ likely binds each *RBM* as a pair of dimers. We  
593 were not able to report RefZ copy number as native RefZ levels are too close to the  
594 detection limit of our antibodies; however, our preliminary data suggest that RefZ is  
595 likely a relatively low copy number protein.

596         Current data suggest the activity of RefZ inhibits rather than promotes FtsZ  
597 assembly<sup>48,49,67</sup>. This raises the question as to how an inhibitor of FtsZ could act near  
598 the pole to promote precise placement of a polar division apparatus. In our model,

599 RefZ is a locally-acting inhibitor of FtsZ and its primary function is not to inhibit the  
600 formation of polar Z-rings altogether, but rather to tune the location of Z-ring assembly  
601 away from the immediate vicinity of the *RBM*s. Based on comparative analysis of the  
602 rLOF mutants, both decreased and increased ability to dimerize appears to be  
603 detrimental to the inhibitory function of RefZ. This implies that a dynamic process of  
604 monomer-dimer exchange, not maintaining a specific oligomeric state, is what is  
605 important for RefZ function. One possibility is that *RBM*-bound dimers disassociate from  
606 DNA as monomers after engaging with FtsZ.

607         We present no evidence that RefZ's DNA association or monomer-dimer  
608 exchange is influenced by a ligand, and no obvious ligand binding pocket is observed in  
609 the regulatory domain of the solved crystal structure. At the same time, we do not  
610 exclude the possibility that RefZ activity could be regulated through interaction with  
611 FtsZ or ligand binding. Recently EthR, an important TetR family protein from  
612 *Mycobacterium tuberculosis* that regulates drug resistance, was shown to bind the  
613 nucleotide cyclic-di-GMP<sup>73</sup>. Interestingly, EthR's proposed nucleotide binding region  
614 (based on mutagenesis and docking studies) is at the dimer interface, outside the  
615 canonical ligand binding pocket<sup>73</sup> (near R102 in RefZ).

616         Another paradox raised is why a  $\Delta refZ$  mutant exhibits a slight delay in shifting  
617 Z-rings from midcell to the pole during sporulation<sup>49</sup>. If RefZ acts as an inhibitor at the  
618 pole, then assembly of the polar Z-ring would be expected to accelerate in a  $\Delta refZ$   
619 mutant. This seeming contradiction may be explained by considering RefZ's  
620 localization during sporulation. At early timepoints, just before polar division occurs,  
621 RefZ-GFP localizes as foci near the poles. These foci likely represent RefZ-*RBM*

622 complexes, as they are lost in a RefZ mutant that cannot bind DNA<sup>49</sup>. Around the time  
623 polar division initiates, the polar RefZ foci become less apparent and RefZ is observed  
624 to coalesce near midcell at or near the membrane<sup>49</sup>. The redistribution of RefZ's  
625 inhibitory activity from the pole to midcell as sporulation progresses could facilitate  
626 disassembly of the midcell Z-ring and its reassembly at the pole<sup>42,43</sup>. Preliminary data  
627 also suggest that RefZ has a second role, to prevent additional midcell divisions as  
628 sporulation progresses (Miller and Herman, unpublished), and current investigations  
629 are aimed at exploring this possibility.

630

## 631 **Methods**

### 632 *General methods*

633 Strains, plasmids, and oligonucleotides are listed in Supplemental S1, S2, and  
634 S3 Tables, respectively. All *Bacillus subtilis* strains were derived from *B. subtilis* 168 or  
635 PY79. Strain and plasmid construction is detailed in the Supporting Information.  
636 Transformations in *B. subtilis* were carried out using a standard protocol as previously  
637 described<sup>74</sup> unless otherwise stated. For selection in *B. subtilis*, antibiotics were  
638 included at the following concentrations: 100 µg ml<sup>-1</sup> spectinomycin, 7.5 µg ml<sup>-1</sup>  
639 chloramphenicol, 10 µg ml<sup>-1</sup> kanamycin, 10 µg ml<sup>-1</sup> tetracycline, 0.8 µg ml<sup>-1</sup> phleomycin,  
640 and 1 µg ml<sup>-1</sup> erythromycin (erm) plus 25 µg ml<sup>-1</sup> lincomycin (MLS). For transformation  
641 and selection in *E. coli*, antibiotics were included at the following concentrations: 100 µg  
642 ml<sup>-1</sup> ampicillin, 25 µg ml<sup>-1</sup> kanamycin, and 25 µg ml<sup>-1</sup> chloramphenicol (for protein  
643 overexpression). Co-transformations for B2H assays were selected for on LB plates  
644 supplemented with 50 µg ml<sup>-1</sup> ampicillin, 25 µg ml<sup>-1</sup> kanamycin, and 0.2% (v/v) glucose.

645

646 *Two-step genetic selection-screen to isolate rLOF mutants*

647       Comprehensive details on construction of the Gibson assemblies and strains  
648 below are available in the supplemental text. The *refZ* gene was mutagenized by error-  
649 prone PCR and the mutant fragment library was introduced into an IPTG-inducible  
650 misexpression construct using Gibson assembly<sup>53</sup>. Multiple assembly reactions were  
651 pooled on ice and directly transformed into super-competent BAM168 cells (selection-  
652 screen background). For transformations, competent cell aliquots were thawed at room  
653 temperature and 0.2 ml were incubated in a 13 mm glass test tube with 20  $\mu$ l assembly  
654 reactions for 90 min in a rollerdrum at 37°C before selecting on LB plates supplemented  
655 100  $\mu$ g ml<sup>-1</sup> spectinomycin and 1 mM IPTG. After overnight growth at 37°C, surviving  
656 transformants were patched on LB plates supplemented with 1% (w/v) starch to screen  
657 for integration at *amyE*, and on LB plates supplemented with the following antibiotics to  
658 assess the presence of the expected parental background resistances: 7.5  $\mu$ g ml<sup>-1</sup>  
659 chloramphenicol, 10  $\mu$ g ml<sup>-1</sup> kanamycin, 10  $\mu$ g ml<sup>-1</sup> tetracycline, and 1  $\mu$ g ml<sup>-1</sup>  
660 erythromycin (*erm*) plus 25  $\mu$ g ml<sup>-1</sup> lincomycin (MLS). Transformants were also patched  
661 on LB plates supplemented with 100  $\mu$ g ml<sup>-1</sup> spectinomycin and 1 mM IPTG and 40  $\mu$ g  
662 ml<sup>-1</sup> X-gal to screen for *lacZ* expression from the  $P_{spremo}$  promoter. Replica plates were  
663 grown overnight at 37°C. Surviving *rLOF* mutants that did not turn blue on patch plates  
664 were cultured from replica plate in liquid LB and stored at -80°C. Genomic DNA  
665 prepared from these strains was PCR amplified with OJH001 and OJH002 to test for the  
666 presence of the expected integration product. PCR products of the expected size were  
667 sequenced to identify mutations.

668

669 *Generation of super-competent cells*

670 Super-competency was achieved using two-fold approach to maximize  
671 transformation efficiency. First, BAM168 (selection-screen background) harbors a  
672 xylose-inducible copy of *comK* at the non-essential *lacA* locus<sup>75</sup>. The presence of 1%  
673 (w/v) xylose in standard transformation cultures improved efficiency ~2.5-fold compared  
674 to cultures grown without xylose. Second, competent cells were prepared by modifying  
675 an established<sup>74</sup> two-step *B. subtilis* competent cell protocol as described below. The  
676 modifications improved transformation efficiency an additional 7-fold over xylose  
677 induction alone. A single colony of freshly streaked recipient cells (BAM168) was used  
678 to inoculate a 250 ml baffled flask containing 25 ml of 1X MC medium (10.7 g L<sup>-1</sup>  
679 K<sub>2</sub>HPO<sub>4</sub>, 5.2 g L<sup>-1</sup> KH<sub>2</sub>PO<sub>4</sub>, 20 g L<sup>-1</sup> glucose, 0.88 g L<sup>-1</sup> tri-sodium citrate dihydrate,  
680 0.022 g L<sup>-1</sup> ferric ammonium citrate, 1 g L<sup>-1</sup> casein hydrolysate (Neogen), 2.2 g L<sup>-1</sup>  
681 potassium glutamate monohydrate, 3 mM MgSO<sub>4</sub>, and 0.02 g L<sup>-1</sup> L-Tryptophan)<sup>74</sup>. The  
682 culture was grown overnight (20-22 h) in a 37°C shaking waterbath set at 250 rpm. The  
683 overnight culture (OD<sub>600</sub> 1.5-2.5) was diluted to an OD<sub>600</sub> of 0.1 in a 250 ml baffled flask  
684 containing 40 ml of 1X MC supplemented with 1% (w/v) xylose. The culture was  
685 incubated at 37°C in a shaking waterbath set at 200 rpm. After 5-6 h of growth, the  
686 OD<sub>600</sub> was monitored every 30 min until readings remained unchanged between two  
687 timepoints, at which point the culture was diluted 1:10 with pre-warmed 1X MC  
688 supplemented with 1% (w/v) xylose to a final volume of 250 ml in a 2 L flask. After 90  
689 min of growth at 37°C and 280 rpm, cells were harvested at room temperature at 1,260  
690 x g for 10 min in six 50 ml conical tubes. Twenty ml of the culture supernatant was

691 retained and mixed with 5 ml 50% (v/v) glycerol. The diluted supernatant was used to  
692 gently resuspend the pellets, and the cell suspensions were immediately frozen at -  
693 80°C in aliquots.

694

#### 695 *Blue-white screen to assess RBM-binding by rLOF mutants*

696 Misexpression constructs harboring either wild-type *refZ* (BAM374), *rLOF*  
697 mutants (BAM400, 403, 407, 409, 411, 440, 443, 444, 449, 462), or an empty  $P_{hy}$  vector  
698 (BAM390) in clean selection-screen backgrounds (Supplemental Text) were streaked  
699 from frozen glycerol stocks on LB plates supplemented with 100  $\mu\text{g ml}^{-1}$  spectinomycin  
700 and 0.2% (v/v) glucose and grown overnight at 37°C. Single colonies were used to  
701 inoculate 3 ml of Lysogeny Broth (LB-Lennox) and cultures were grown in a rollerdrum  
702 at 30°C until early to mid-log (3-5 h). Cultures were normalized to the lowest  $\text{OD}_{600}$  with  
703 PBS ( $10^0$ ) and serially diluted ( $10^{-1}$ ,  $10^{-2}$ ,  $10^{-3}$ ). Five  $\mu\text{l}$  of each dilution was spotted on LB  
704 plates supplemented with 100  $\mu\text{g ml}^{-1}$  spectinomycin and 1 mM IPTG and 40  $\mu\text{g ml}^{-1}$  X-  
705 gal followed by overnight incubation at 37°C to visually screen for *lacZ* expression from  
706 the  $P_{spremo}$  promoter. Plates were scanned with a ScanJet G4050 flatbed scanner  
707 (Hewlett Packard) using VueScan software and medium format mode. Images were  
708 processed using Adobe Photoshop (version 12.0).

709

#### 710 *Misexpression of wild-type refZ and rLOF variants*

711 Misexpression constructs harboring either wild-type *refZ* (BJH228) or the *rLOF*  
712 mutants (BAM428, 431, 434, 436, 450, 451, 454, 455, 457, 490) in a wild-type  
713 background (Supplemental Text) were streaked from frozen glycerol stocks on 100  $\mu\text{g}$

714 ml<sup>-1</sup> spectinomycin plates and grown overnight at 37°C. CH cultures (25 ml) were  
715 prepared as described under *Fluorescence microscopy*. Misexpression was induced  
716 with 1 mM IPTG following 1.5-2 h of growth at 37°C (approx. OD<sub>600</sub> 0.10). For the  
717 uninduced controls in Figure 1C and 1D, an independent culture of the control strain,  
718 BJH228 (*P<sub>hy</sub>-refZ*), was grown in parallel but was not induced. Growth was resumed at  
719 37°C with shaking for 45 min (see *Western blotting*) or 90 min (see *Fluorescence*  
720 *microscopy*) before 1 ml samples were harvested.

721

## 722 *Fluorescence microscopy*

723 For microscopy experiments, isolated colonies were used to inoculate 5 ml CH  
724 and cultures were grown overnight at room temperature in a rollerdrum. Cultures below  
725 an OD<sub>600</sub> of 0.7 were used to inoculate 25 ml CH medium in 250 ml baffled flasks to a  
726 calculated OD<sub>600</sub> of 0.006 (for misexpression) or 0.018 (for chromosome capture  
727 assays) and cultures were grown for the indicated time at 37°C in a shaking waterbath  
728 set at 280 rpm. Samples were collected at 6,010 x g for 1 min in a tabletop  
729 microcentrifuge. Following aspiration of supernatants, pellets were resuspended in 3-5  
730 µL of 1X PBS containing 0.02 mM 1-(4-(trimethylamino)phenyl)-6-phenylhexa-1,3,5-  
731 triene (TMA-DPH)(Life Technologies) and cells were mounted on glass slides with  
732 polylysine-treated coverslips. Images were captured and analyzed with NIS Elements  
733 Advanced Research (version 4.10) software, using 600 ms (CFP), 900 ms (YFP), or 1 s  
734 (TMA) exposure times on a Nikon Ti-E microscope equipped with a CFI Plan Apo  
735 lambda DM 100X objective, a Prior Scientific Lumen 200 Illumination system, C-FL UV-



736 2E/C DAPI, C-FL YFP HC HISN Zero Shift, and C-FL Cyan GFP filter cubes, and a  
737 CoolSNAP HQ2 monochrome camera.

738

### 739 *Western blotting*

740 Samples were harvested at 21,130x g for 1 min in a tabletop centrifuge. Pellets  
741 were washed with 50  $\mu$ l of 1X PBS and the remaining supernatant was carefully  
742 removed using a P20 pipet. Pellets were frozen at -80°C until processing. Frozen  
743 pellets were thawed on ice before resuspension in 25  $\mu$ l of lysis buffer (20 mM Tris [pH  
744 7.5], 10 mM EDTA, 1 mg ml<sup>-1</sup> lysozyme, 10  $\mu$ g ml<sup>-1</sup> DNase I, 100  $\mu$ g ml<sup>-1</sup> RNase A, and  
745 1 mM phenylmethylsulfonyl fluoride). Samples were normalized by OD<sub>600</sub> values  
746 obtained at the time of harvest by diluting resuspensions in additional lysis buffer before  
747 incubating at 37°C for 15 min. Samples were diluted 1:1 with 2X sample buffer (250 mM  
748 Tris [pH 6.8], 10 mM EDTA, 4% (v/v) SDS, 20% (v/v) glycerol, and 10% (v/v) 2-  
749 mercaptoethanol) and boiled for 10 min. Five  $\mu$ l of each lysate was loaded on a 4-20%  
750 gradient polyacrylamide gel (Lonza) and proteins were separated by electrophoresis  
751 prior to transfer to a nitrocellulose membrane (Pall)(1 h at 60 V). Membranes were  
752 blocked for 1 h at room temperature in 5% (w/v) nonfat milk in PBS [pH 7.4] with 0.05%  
753 (v/v) Tween-20. Membranes were incubated overnight at 4°C with polyclonal rabbit  
754 anti-RefZ antibody (Covance) diluted 1:1,000 in 5% (w/v) nonfat milk in PBS [pH 7.4]  
755 with 0.05% (v/v) Tween-20. Membranes were washed prior to a 1 h room temperature  
756 incubation with horseradish peroxidase-conjugated goat anti-rabbit Immunoglobulin G  
757 secondary antibody (Bio-Rad) diluted 1:10,000 in 5% (w/v) nonfat milk in PBS [pH 7.4]  
758 with 0.05% (v/v) Tween-20. Washed membranes were incubated with SuperSignal

759 West Femto Maximum Sensitivity substrate (Thermo Scientific) according to the  
760 manufacturer's instructions. Chemiluminescence was detected and imaged using an  
761 Amersham Imager 600 (GE Healthcare). Images were processed using ImageJ64<sup>76</sup>.

762

### 763 *Chromosome capture assay with the rLOF mutants*

764 Strains used in the chromosome capture assay in Fig 2 harboring the left arm (-  
765  $61^\circ P_{spolIQ-cfp}$ ) or right arm ( $+51^\circ P_{spolIQ-cfp}$ ) reporter in the wild type, *refZ* mutant, or  
766 *rLOF* mutant trapping backgrounds (Supporting Information S1 Table) were streaked  
767 from frozen stocks on LB agar plates and grown overnight at 37°C. Chromosome  
768 capture assays were carried out as previously described<sup>18,48</sup>. CH cultures (25 ml) were  
769 prepared as described in *Fluorescence microscopy* and grown for 2.5-3 h (OD<sub>600</sub> 0.6-  
770 0.8) before sporulation was induced by resuspension according to the Sterlini-  
771 Mandelstam method<sup>74</sup>. Growth was resumed at 37°C in a shaking waterbath for 2.5 h  
772 prior to TMA-DPH, YFP, and CFP image acquisition (see *Fluorescence microscopy*).

773 Each strain harbors a  $\sigma^F$ -dependent *oriC*-proximal reporter ( $-7^\circ P_{spolIQ-yfp}$ ) that is  
774 captured in the forespore in 99.5% of sporulating cells. Cells expressing YFP serve as  
775 the baseline for total sporulating cells counted in the field. To visualize cells in a given  
776 field that expressed the left or right arm reporters in the forespore, captured YFP and  
777 CFP images were individually merged with the TMA (membrane) image. The total  
778 number of forespores with YFP signal (total YFP) or CFP signal (total CFP) were  
779 manually marked and counted as described previously<sup>48</sup>.

780 For quantitation and statistical analysis, a minimum of 1,500 cells per strain were  
781 counted from three independent biological and experimental replicates, with the

782 exception of wildtype (left and right arms, n=7) and the E53K (right arm, n=4). The  
783 average proportion of cells expressing both reporters for each strain is given in Figure 2,  
784 with error bars representing one standard deviation above and below the average. Two-  
785 tailed Student's t-tests were performed to determine the P-values indicated in the  
786 pairwise comparisons.

787

### 788 *Protein Purification*

789 *E. coli* BL21(DE3) pLysS competent cells were transformed with either pLM025a  
790 (RefZ-His6) or pEB013-pEB022 (rLOF-His6) and grown overnight at 37°C on LB plates  
791 supplemented with 25 µg ml<sup>-1</sup> kanamycin, 25 µg ml<sup>-1</sup> chloramphenicol and 0.1% (v/v)  
792 glucose. Transformants were scraped from plates and resuspended in 2 ml of Cinnabar  
793 High-Yield protein expression media (Teknova, Cat No. 3C8488) containing 25 µg ml<sup>-1</sup>  
794 kanamycin, 25 µg ml<sup>-1</sup> chloramphenicol and 0.1% (v/v) glucose. The OD<sub>600</sub> was  
795 measured and used to inoculate 4 x 25 ml of the same medium in 250 ml baffled flasks  
796 to an OD<sub>600</sub> of 0.1. Cultures were grown at 37°C in a shaking waterbath at 280 rpm for  
797 6-7 h until the culture density reached OD<sub>600</sub> = 5.0. Protein expression was induced  
798 with 1 mM IPTG and growth was resumed for an additional 3 h before cultures were  
799 harvested by centrifugation at 9,639 x g for 5 min at 4°C. Pellets were stored at -80°C  
800 until processing. Four pellets (25 ml culture each) were resuspended in 40 ml of lysis  
801 Buffer (50 mM Tris-HCl [pH 9.0], 300 mM KCl, 10% (v/v) glycerol, and 10 mM  
802 imidazole). 1 µl protease inhibitor (Sigma-Aldrich, Cat No. P8465)(215 mg powder  
803 dissolved in 1 ml of DMSO and 4 ml ddH<sub>2</sub>O) was added per 35 OD<sub>600</sub> units. DNase I  
804 was added to a final concentration of 1 µg ml<sup>-1</sup> of cell suspension. Suspensions were

805 passed through a Microfluidizer LM20-30 five times at 10,000 psi. Cell debris was  
806 cleared by centrifugation at 22,662 x g for 30 min at 4°C. Supernatants were passed  
807 over a 1 ml bed volume of Nickel-NTA agarose beads (Qiagen, Cat No. 30210) pre-  
808 equilibrated with lysis buffer. Bound protein was washed with 10 ml of wash buffer (50  
809 mM Tris-HCl [pH 9.0], 300 mM KCl, 10% (v/v) glycerol, and 20 mM imidazole). Protein  
810 was eluted with 7 ml of elution buffer (50 mM Tris-HCl [pH 9.0], 300 mM KCl, 10% (v/v)  
811 glycerol, and 250 mM imidazole) and collected as ~250 µl fractions. 2 µl was removed  
812 from each fraction for SDS-PAGE analysis, and elutions were immediately stored at -  
813 80°C. Peak elution fractions were thawed and pooled before dialyzing at 4°C with  
814 stirring into either elution buffer (50 mM Tris-HCl [pH 9.0], 300 mM KCl, 10% (v/v)  
815 glycerol, and 250 mM imidazole) or ddH<sub>2</sub>O using Slide-A-Lyzer® 7.0 kDa MWCO  
816 dialysis cassettes (ThermoFisher) Scientific). Final protein concentrations were  
817 determined using Bradford reagent (Bio-Rad) and a BSA standard.

818

### 819 *Protein crystallization, data collection, and data analysis*

820 RefZ-His6 was overexpressed and purified as described above. Before dialysis  
821 the RefZ concentration was determined and dsDNA (generated by annealing  
822 OEB025/OEB026) was added to a 4:1 molar ratio of RefZ:*RBM<sub>L2-24bp</sub>*. The protein was  
823 dialyzed into 50 mM Tris-HCl [pH 8.5] and 300 mM KCl. After dialysis, RefZ was  
824 concentrated in a 10 kDa Vivaspin Turbo MWCO filter (Sartorius) to ~5 mg ml<sup>-1</sup>, and  
825 0.5-1.0 µl of the concentrated protein was used to set crystallization plates. RefZ  
826 crystals formed within 48 h by hanging drop vapor diffusion at 16°C after mixing the  
827 protein in a 1:1 volume ratio with 10% ethanol (v/v), 0.1 M imidazole [pH 8.0], and 0.2 M

828 MgCl<sub>2</sub>. The crystals were cryoprotected in 20% (v/v) glycerol in mother liquor before  
829 flash freezing in liquid nitrogen. For anomalous signal, RefZ crystals were soaked with  
830 1 mM lead acetate for 5 h and the data were collected at the Argonne National Lab  
831 APS synchrotron, beamlines 23-ID, at 0.9496 Å. Diffraction data were indexed,  
832 integrated, and scaled in HKL2000<sup>77</sup> and the single heavy atom site was identified by  
833 phasing using single anomalous dispersion (SAD) in the SHELX program<sup>78</sup>. The  
834 resultant phases were extended to a native crystal data set collected at the same  
835 beamline at 0.98 Å. The native set was indexed, integrated, and scaled using  
836 PROTEUM3 software (Version 2016.2, Bruker AXS Inc). The native crystal data were  
837 truncated in Ctruncate<sup>79</sup> from CCP4 suite<sup>80</sup> and subjected to iterative building and  
838 phase improvement by PHENIX<sup>81</sup>. The partial model produced by PHENIX was rebuilt  
839 in BUCCANEER<sup>82</sup> relying on improved phases. BUCCANEER was able to build the  
840 whole model in one continuous chain, docked in sequence and covering residues 1-  
841 200. The model was improved through iterative runs of inspection and manual  
842 modification in COOT<sup>83</sup> and refinement in PHENIX<sup>81</sup> with simulated annealing on initial  
843 runs. The data collection and refinement statistics can be found in Table 1.

844

845

#### 846 *Annealing of oligos to generate dsDNA*

847

848 Oligonucleotides were resuspended in annealing buffer (10 mM Tris-HCl [pH  
849 7.5], 50 mM NaCl, and 1 mM EDTA) to a concentration of 1 mM. Equal volumes were  
850 mixed and annealed in a thermocycler by heating to 95°C for 2 min followed by ramp  
851 cooling for 45 min to 25°C. The annealing buffer was removed by dialysis into ddH<sub>2</sub>O  
852 with Slide-A-Lyzer® 7.0 kDa MWCO Dialysis Cassettes (Thermo Scientific).

853

#### 854 *Electrophoretic gel mobility shift assays*

855 DNA fragments centered on either the native (using *B. subtilis* 168 as template)  
856 or the mutant (using BJH205 as template) *RBM<sub>L1</sub>* sequence<sup>48</sup> were generated by PCR  
857 using primer pair OEB009 and OEB010. Purified RefZ-His6 or rLOF-His6 protein (final  
858 concentrations indicated in Figure 6) were incubated with 10 nM *RBM<sub>L1</sub>* or *RBM<sub>L1mu</sub>*  
859 DNA probes in binding buffer (150 mM KCl and 10 mM Tris-HCl [pH 8.0]) for 30 min.  
860 After 30 min incubation, 10X loading buffer (50 mM EDTA [pH 8.0], 1 mM Tris-HCl [pH  
861 8.0] and 45% (v/v) glycerol) was added to a final concentration of 1X and binding  
862 reactions were resolved at room temperature on a 5% TBE polyacrylamide gel run for  
863 45 min at 150 V (Fig 6) or a 7.5% TBE polyacrylamide gel for 17 min at 200 V (S3 Fig).  
864 After electrophoresis, gels were incubated with agitation in 1X SYBR Green EMSA gel  
865 stain (Life Technologies)(diluted from 10,000X stock in TBE buffer) for 5 min then  
866 rinsed with dH<sub>2</sub>O. Stained DNA was imaged with a Typhoon FLA 9500 scanner using  
867 the setting for Fluorescence and LPB (510LP) filter for SYBR Green. The data  
868 presented in Figure 6 is representative of a minimum of three independent experimental  
869 replicates for wild type and each variant.

870

#### 871 *Bio-layer Interferometry Assay*

872 The Octet system (Pall Forte Bio) was used to monitor the kinetic interactions  
873 between wild-type RefZ or the rLOF variants and *RBM*-containing DNA. Streptavidin  
874 biosensors (Part NO 18-5019) were purchased from Pall Forte Bio. A 41 bp *RBM*-  
875 containing (*RBM<sub>L1</sub>*) segment of dsDNA was generated by annealing 5' biotinylated

876 OEB091 with OEB092 as described (see *Annealing of oligos to generate dsDNA*)  
877 except that the annealing buffer was not removed by dialysis. All subsequent assays  
878 were performed in DNA binding buffer (150 mM KCl and 10 mM Tris-HCl [pH 8.0]).  
879 Sensors were pre-equilibrated for 10 min at room temperature in DNA-binding buffer to  
880 establish a baseline reading. Sensors were then dipped into a well containing 50 nM  
881 *RBM<sub>L1</sub>* dsDNA and incubated for 2 min with shaking at 1,000 rpm to immobilize DNA on  
882 the biosensor. The sensor was washed for 30 sec to establish a new baseline before  
883 transfer to a solution containing 800 nM of wild-type RefZ or rLOF variants. Following a  
884 3 min monitored association, the complex was placed into fresh buffer and dissociation  
885 was monitored continuously for 15 min. The  $K_d$  was calculated using the global fit in  
886 Pall Forte Bio's analysis software. Three experimental replicates of each assay were  
887 performed except for variant R102C (n=4). The mean values and standard deviations  
888 are given in Figure 6. P-values were determined using a two-tailed unpaired Student's  
889 t-test.

890  
891

#### 892 *Size-exclusion chromatography*

893  
894

894 A Superdex 200 PC 3.2/30 3.2 × 300 mm column was equilibrated with 50 mM  
895 Tris-HCl [pH 9.0], 300 mM KCl, and 10% (v/v) Glycerol. Wild-type RefZ and rLOF  
896 proteins from frozen stocks (ddH<sub>2</sub>O) were diluted to a final concentration of 1 mg ml<sup>-1</sup> in  
897 200 µl of buffer (50 mM Tris-HCl [pH 9.0], 300 mM KCl, 10% (v/v) Glycerol). Samples  
898 were pre-spun at 21,130 × g for 10 min at 4°C in a tabletop centrifuge prior to injection.  
899 The absorbance at 280 nm was continuously measured and the  $V_e$ , peak maximum,  
900 was taken from the resulting elution profile and used to calculate  $K_{av}$  using the formula

901  $(V_e - V_o)/(V_t - V_o)$ . The void volume,  $V_o$  was experimentally determined to be 7 ml. The  
902 total volume,  $V_t$ , of the column was 24 ml. The apparent molecular mass was  
903 estimated using a curve generated from an identical run with a molecular mass  
904 standard (Bio-Rad Gel filtration chromatography standard, cat. no. 151-1901).

905

#### 906 *Bacterial 2-hybrid analysis of rLOF variants*

907 Assays were carried out essentially as previously described<sup>48,66</sup>. Plasmids  
908 harboring wild-type *refZ* and the rLOF sequences fused with C-terminal T18 and T25  
909 tags (see Supplemental for plasmid construction) were co-transformed into competent  
910 *E.coli* DHP1 (*cya*-) cells with selection on LB plates supplemented with 50  $\mu\text{g ml}^{-1}$   
911 ampicillin, 25  $\mu\text{g ml}^{-1}$  kanamycin, and 0.2% (v/v) glucose. Co-transformed *E.coli* strains  
912 were streaked from frozen stocks and single colonies were cultured in 4 ml of LB  
913 supplemented with 50  $\mu\text{g ml}^{-1}$  ampicillin, 25  $\mu\text{g ml}^{-1}$  kanamycin, and 0.1% (v/v) glucose  
914 in a 37°C roller drum to mid-log growth phase. Culture samples were normalized to the  
915 lowest OD culture with fresh LB supplemented with 50  $\mu\text{g ml}^{-1}$  ampicillin and 25  $\mu\text{g ml}^{-1}$   
916 kanamycin, and 5  $\mu\text{l}$  were spotted on M9-glucose minimal plates supplemented with 50  
917  $\mu\text{g ml}^{-1}$  ampicillin, 25  $\mu\text{g ml}^{-1}$  kanamycin, 250  $\mu\text{M}$  IPTG, and 40  $\mu\text{g ml}^{-1}$  X-gal. Pairwise  
918 interactions between the T18 and T25 fusions were assessed by monitoring the  
919 development of blue color (corresponding to *lacZ* expression) following 40-50 h of  
920 growth at room temperature. Figure 7B is representative of three independent biological  
921 and experimental replicates.

922

#### 923 *Differential Scanning Fluorimetry (DSF)*



924 Purified RefZ or rLOF variants from frozen stocks (50 mM Tris-HCl [pH 9.0], 300  
925 mM KCl, 10% (v/v) glycerol, and 250 mM imidazole) were thawed and diluted in 20 mM  
926 Tris-HCl [pH 7.5] to a final concentration of 10  $\mu$ M. To ensure an identical final  
927 concentration of storage buffer for all rLOF variants, reactions were normalized to the  
928 maximum required concentration of storage buffer determined by the lowest rLOF  
929 variant concentration; the final buffer concentration was 0.16X. All reactions contained  
930 5X SYPRO™ Orange Protein Gel Stain (ThermoFisher) diluted to a working  
931 concentration in DMSO. The DSF assays were performed in a 96-well hardshell PCR  
932 plate (Bio-Rad, HSP9601) using a CFX96 Touch™ Real-Time PCR Detection System  
933 (Bio-Rad). The reactions were ramped from 25°C to 95°C at a rate of 1°C min<sup>-1</sup>.

934

#### 935 **Accession codes**

936 The coordinates and structure factors for RefZ have been deposited in the Protein Data  
937 Bank (PDB: 6MJ1).

938

#### 939 **Acknowledgements**

940 We thank Larry Dangott and the Protein Chemistry Lab at Texas A&M for helpful advice  
941 regarding protein purification, Ann Tran for her efforts toward constructing B2H plasmids  
942 and quantifying rLOF trapping data, and members of the Herman Lab for critical reading  
943 of the manuscript. This work was supported by a grant from the National Science  
944 Foundation to J.K.H. (MCB-1514629).

945

946

947 **References**

- 948 1. Antony, B. Mechanisms of membrane curvature sensing. *Annu Rev Biochem*  
949 **80**, 101-23 (2011).
- 950 2. Updegrove, T.B. & Ramamurthi, K.S. Geometric protein localization cues in  
951 bacterial cells. *Curr Opin Microbiol* **36**, 7-13 (2017).
- 952 3. Bramkamp, M. et al. A novel component of the division-site selection system of  
953 *Bacillus subtilis* and a new mode of action for the division inhibitor MinCD. *Mol*  
954 *Microbiol* **70**, 1556-69 (2008).
- 955 4. Eswaramoorthy, P. et al. Cellular architecture mediates DivIVA ultrastructure and  
956 regulates Min activity in *Bacillus subtilis*. *MBio* **2**(2011).
- 957 5. Gregory, J.A., Becker, E.C. & Pogliano, K. *Bacillus subtilis* MinC destabilizes  
958 FtsZ-rings at new cell poles and contributes to the timing of cell division. *Genes*  
959 *Dev* **22**, 3475-88 (2008).
- 960 6. Marston, A.L. & Errington, J. Selection of the midcell division site in *Bacillus*  
961 *subtilis* through MinD-dependent polar localization and activation of MinC. *Mol*  
962 *Microbiol* **33**, 84-96 (1999).
- 963 7. Patrick, J.E. & Kearns, D.B. MinJ (YvjD) is a topological determinant of cell  
964 division in *Bacillus subtilis*. *Mol Microbiol* **70**, 1166-79 (2008).
- 965 8. Du, S. & Lutkenhaus, J. Assembly and activation of the *Escherichia coli*  
966 divisome. *Mol Microbiol* **105**, 177-187 (2017).
- 967 9. Surovtsev, I.V. & Jacobs-Wagner, C. Subcellular organization: a critical feature of  
968 bacterial cell replication. *Cell* **172**, 1271-1293 (2018).
- 969 10. Bowman, G.R. et al. A polymeric protein anchors the chromosomal origin/ParB  
970 complex at a bacterial cell pole. *Cell* **134**, 945-55 (2008).
- 971 11. Ebersbach, G., Briegel, A., Jensen, G.J. & Jacobs-Wagner, C. A self-associating  
972 protein critical for chromosome attachment, division, and polar organization in  
973 *Caulobacter*. *Cell* **134**, 956-68 (2008).
- 974 12. Lim, H.C. et al. Evidence for a DNA-relay mechanism in ParABS-mediated  
975 chromosome segregation. *Elife* **3**, e02758 (2014).
- 976 13. Surovtsev, I.V., Lim, H.C. & Jacobs-Wagner, C. The slow mobility of the ParA  
977 partitioning protein underlies its steady-state patterning in *Caulobacter*. *Biophys J*  
978 **110**, 2790-2799 (2016).
- 979 14. Badrinarayanan, A., Le, T.B. & Laub, M.T. Bacterial chromosome organization  
980 and segregation. *Annu Rev Cell Dev Biol* **31**, 171-99 (2015).
- 981 15. Scholefield, G., Whiting, R., Errington, J. & Murray, H. Spo0J regulates the  
982 oligomeric state of Soj to trigger its switch from an activator to an inhibitor of DNA  
983 replication initiation. *Mol Microbiol* **79**, 1089-100 (2011).
- 984 16. Grilley, M., Welsh, K.M., Su, S.S. & Modrich, P. Isolation and characterization of  
985 the *Escherichia coli mutL* gene product. *J Biol Chem* **264**, 1000-4 (1989).
- 986 17. Modrich, P. Methyl-directed DNA mismatch correction. *J Biol Chem* **264**, 6597-  
987 600 (1989).
- 988 18. Sullivan, N.L., Marquis, K.A. & Rudner, D.Z. Recruitment of SMC by ParB-parS  
989 organizes the origin region and promotes efficient chromosome segregation. *Cell*  
990 **137**, 697-707 (2009).

- 991 19. Wang, X., Montero Llopis, P. & Rudner, D.Z. *Bacillus subtilis* chromosome  
992 organization oscillates between two distinct patterns. *Proc Natl Acad Sci U S A*  
993 **111**, 12877-82 (2014).
- 994 20. Hansen, F.G. & Atlung, T. The DnaA Tale. *Front Microbiol* **9**, 319 (2018).
- 995 21. Leonard, A.C. & Grimwade, J.E. The orisome: structure and function. *Front*  
996 *Microbiol* **6**, 545 (2015).
- 997 22. Ben-Yehuda, S. et al. Defining a centromere-like element in *Bacillus subtilis* by  
998 identifying the binding sites for the chromosome-anchoring protein RacA. *Mol*  
999 *Cell* **17**, 773-82 (2005).
- 1000 23. Ben-Yehuda, S., Rudner, D.Z. & Losick, R. RacA, a bacterial protein that anchors  
1001 chromosomes to the cell poles. *Science* **299**, 532-6 (2003).
- 1002 24. Wang, X., Brandao, H.B., Le, T.B., Laub, M.T. & Rudner, D.Z. *Bacillus subtilis*  
1003 SMC complexes juxtapose chromosome arms as they travel from origin to  
1004 terminus. *Science* **355**, 524-527 (2017).
- 1005 25. Wu, L.J. & Errington, J. RacA and the Soj-Spo0J system combine to effect polar  
1006 chromosome segregation in sporulating *Bacillus subtilis*. *Mol Microbiol* **49**, 1463-  
1007 75 (2003).
- 1008 26. Burton, B. & Dubnau, D. Membrane-associated DNA transport machines. *Cold*  
1009 *Spring Harb Perspect Biol* **2**, a000406 (2010).
- 1010 27. Adams, D.W., Wu, L.J. & Errington, J. Nucleoid occlusion protein Noc recruits  
1011 DNA to the bacterial cell membrane. *EMBO J* **34**, 491-501 (2015).
- 1012 28. Bernhardt, T.G. & de Boer, P.A. SlmA, a nucleoid-associated, FtsZ binding  
1013 protein required for blocking septal ring assembly over chromosomes in *E. coli*.  
1014 *Mol Cell* **18**, 555-64 (2005).
- 1015 29. Schumacher, M.A. & Zeng, W. Structures of the nucleoid occlusion protein SlmA  
1016 bound to DNA and the C-terminal domain of the cytoskeletal protein FtsZ. *Proc*  
1017 *Natl Acad Sci U S A* **113**, 4988-93 (2016).
- 1018 30. Cho, H., McManus, H.R., Dove, S.L. & Bernhardt, T.G. Nucleoid occlusion factor  
1019 SlmA is a DNA-activated FtsZ polymerization antagonist. *Proc Natl Acad Sci U S*  
1020 *A* **108**, 3773-8 (2011).
- 1021 31. Tonthat, N.K. et al. Molecular mechanism by which the nucleoid occlusion factor,  
1022 SlmA, keeps cytokinesis in check. *EMBO J* **30**, 154-64 (2011).
- 1023 32. Rowlett, V.W. & Margolin, W. The Min system and other nucleoid-independent  
1024 regulators of Z ring positioning. *Front Microbiol* **6**, 478 (2015).
- 1025 33. Bailey, M.W., Bisicchia, P., Warren, B.T., Sherratt, D.J. & Mannik, J. Evidence for  
1026 divisome localization mechanisms independent of the Min system and SlmA in  
1027 *Escherichia coli*. *PLoS Genet* **10**, e1004504 (2014).
- 1028 34. Buss, J.A., Peters, N.T., Xiao, J. & Bernhardt, T.G. ZapA and ZapB form an FtsZ-  
1029 independent structure at midcell. *Mol Microbiol* **104**, 652-663 (2017).
- 1030 35. Wu, L.J. & Errington, J. Coordination of cell division and chromosome  
1031 segregation by a nucleoid occlusion protein in *Bacillus subtilis*. *Cell* **117**, 915-25  
1032 (2004).
- 1033 36. Wu, L.J. et al. Noc protein binds to specific DNA sequences to coordinate cell  
1034 division with chromosome segregation. *EMBO J* **28**, 1940-52 (2009).

- 1035 37. Webb, C.D. et al. Bipolar localization of the replication origin regions of  
1036 chromosomes in vegetative and sporulating cells of *B. subtilis*. *Cell* **88**, 667-74  
1037 (1997).
- 1038 38. Wu, L.J. & Errington, J. Use of asymmetric cell division and *spoIIIE* mutants to  
1039 probe chromosome orientation and organization in *Bacillus subtilis*. *Mol Microbiol*  
1040 **27**, 777-86 (1998).
- 1041 39. Kloosterman, T.G. et al. Complex polar machinery required for proper  
1042 chromosome segregation in vegetative and sporulating cells of *Bacillus subtilis*.  
1043 *Mol Microbiol* **101**, 333-50 (2016).
- 1044 40. Gonzy-Treboul, G., Karmazyn-Campelli, C. & Stragier, P. Developmental  
1045 regulation of transcription of the *Bacillus subtilis* *ftsAZ* operon. *J Mol Biol* **224**,  
1046 967-79 (1992).
- 1047 41. Levin, P.A. & Losick, R. Transcription factor Spo0A switches the localization of  
1048 the cell division protein FtsZ from a medial to a bipolar pattern in *Bacillus subtilis*.  
1049 *Genes Dev* **10**, 478-88 (1996).
- 1050 42. Ben-Yehuda, S. & Losick, R. Asymmetric cell division in *B. subtilis* involves a  
1051 spiral-like intermediate of the cytokinetic protein FtsZ. *Cell* **109**, 257-66 (2002).
- 1052 43. Khvorova, A., Zhang, L., Higgins, M.L. & Piggot, P.J. The *spoIIIE* locus is involved  
1053 in the Spo0A-dependent switch in the location of FtsZ rings in *Bacillus subtilis*. *J*  
1054 *Bacteriol* **180**, 1256-60 (1998).
- 1055 44. Frandsen, N., Barak, I., Karmazyn-Campelli, C. & Stragier, P. Transient gene  
1056 asymmetry during sporulation and establishment of cell specificity in *Bacillus*  
1057 *subtilis*. *Genes Dev* **13**, 394-9 (1999).
- 1058 45. Wang, S.T. et al. The forespore line of gene expression in *Bacillus subtilis*. *J Mol*  
1059 *Biol* **358**, 16-37 (2006).
- 1060 46. Fiche, J.B. et al. Recruitment, assembly, and molecular architecture of the  
1061 SpoIIIE DNA pump revealed by superresolution microscopy. *PLoS Biol* **11**,  
1062 e1001557 (2013).
- 1063 47. Wu, L.J. & Errington, J. *Bacillus subtilis* SpoIIIE protein required for DNA  
1064 segregation during asymmetric cell division. *Science* **264**, 572-5 (1994).
- 1065 48. Miller, A.K., Brown, E.E., Mercado, B.T. & Herman, J.K. A DNA-binding protein  
1066 defines the precise region of chromosome capture during *Bacillus* sporulation.  
1067 *Mol Microbiol* **99**, 111-22 (2016).
- 1068 49. Wagner-Herman, J.K. et al. RefZ facilitates the switch from medial to polar  
1069 division during spore formation in *Bacillus subtilis*. *J Bacteriol* **194**, 4608-18  
1070 (2012).
- 1071 50. Britton, R.A. et al. Genome-wide analysis of the stationary-phase sigma factor  
1072 (sigma-H) regulon of *Bacillus subtilis*. *J Bacteriol* **184**, 4881-90 (2002).
- 1073 51. Fujita, M., Gonzalez-Pastor, J.E. & Losick, R. High- and low-threshold genes in  
1074 the Spo0A regulon of *Bacillus subtilis*. *J Bacteriol* **187**, 1357-68 (2005).
- 1075 52. Molle, V. et al. The Spo0A regulon of *Bacillus subtilis*. *Mol Microbiol* **50**, 1683-  
1076 701 (2003).
- 1077 53. Gibson, D.G. et al. Enzymatic assembly of DNA molecules up to several hundred  
1078 kilobases. *Nat Methods* **6**, 343-5 (2009).

- 1079 54. Yu, Z., Reichheld, S.E., Savchenko, A., Parkinson, J. & Davidson, A.R. A  
1080 comprehensive analysis of structural and sequence conservation in the TetR  
1081 family transcriptional regulators. *J Mol Biol* **400**, 847-64 (2010).
- 1082 55. Gibrat, J.F., Madej, T. & Bryant, S.H. Surprising similarities in structure  
1083 comparison. *Curr Opin Struct Biol* **6**, 377-85 (1996).
- 1084 56. Agari, Y., Sakamoto, K., Kuramitsu, S. & Shinkai, A. Transcriptional repression  
1085 mediated by a TetR family protein, PfmR, from *Thermus thermophilus* HB8. *J*  
1086 *Bacteriol* **194**, 4630-41 (2012).
- 1087 57. Crowe, A.M. et al. Structural and functional characterization of a ketosteroid  
1088 transcriptional regulator of *Mycobacterium tuberculosis*. *J Biol Chem* **290**, 872-82  
1089 (2015).
- 1090 58. Tonthat, N.K. et al. SImA forms a higher-order structure on DNA that inhibits  
1091 cytokinetic Z-ring formation over the nucleoid. *Proc Natl Acad Sci U S A* **110**,  
1092 10586-91 (2013).
- 1093 59. Schumacher, M.A. et al. Structural mechanisms of QacR induction and multidrug  
1094 recognition. *Science* **294**, 2158-63 (2001).
- 1095 60. Grkovic, S., Brown, M.H., Schumacher, M.A., Brennan, R.G. & Skurray, R.A. The  
1096 *Staphylococcal* QacR multidrug regulator binds a correctly spaced operator as a  
1097 pair of dimers. *J Bacteriol* **183**, 7102-9 (2001).
- 1098 61. Cho, H. & Bernhardt, T.G. Identification of the SImA active site responsible for  
1099 blocking bacterial cytokinetic ring assembly over the chromosome. *PLoS Genet*  
1100 **9**, e1003304 (2013).
- 1101 62. Cuthbertson, L. & Nodwell, J.R. The TetR family of regulators. *Microbiol Mol Biol*  
1102 *Rev* **77**, 440-75 (2013).
- 1103 63. Engohang-Ndong, J. et al. EthR, a repressor of the TetR/CamR family implicated  
1104 in ethionamide resistance in mycobacteria, octamerizes cooperatively on its  
1105 operator. *Mol Microbiol* **51**, 175-88 (2004).
- 1106 64. Rodikova, E.A. et al. Two HlyIIIR dimers bind to a long perfect inverted repeat in  
1107 the operator of the hemolysin II gene from *Bacillus cereus*. *FEBS Lett* **581**, 1190-  
1108 6 (2007).
- 1109 65. Singh, A.K. et al. Crystal Structure of Fad35R from *Mycobacterium tuberculosis*  
1110 H37Rv in the Apo-State. *PLoS One* **10**, e0124333 (2015).
- 1111 66. Karimova, G., Pidoux, J., Ullmann, A. & Ladant, D. A bacterial two-hybrid system  
1112 based on a reconstituted signal transduction pathway. *Proc Natl Acad Sci U S A*  
1113 **95**, 5752-6 (1998).
- 1114 67. Barak, I. & Muchova, K. The positioning of the asymmetric septum during  
1115 sporulation in *Bacillus subtilis*. *PLoS One* **13**, e0201979 (2018).
- 1116 68. Shiu-Hin Chan, D. et al. Structural insights into the EthR-DNA interaction using  
1117 native mass spectrometry. *Chem Commun (Camb)* **53**, 3527-3530 (2017).
- 1118 69. Szwedziak, P., Wang, Q., Freund, S.M. & Lowe, J. FtsA forms actin-like  
1119 protofilaments. *EMBO J* **31**, 2249-60 (2012).
- 1120 70. Choi, H., Min, K., Mikami, B., Yoon, H.J. & Lee, H.H. Structural and Biochemical  
1121 Studies Reveal a Putative FtsZ Recognition Site on the Z-ring Stabilizer ZapD.  
1122 *Mol Cells* **39**, 814-820 (2016).
- 1123 71. Schumacher, M.A., Huang, K.H., Zeng, W. & Janakiraman, A. Structure of the Z  
1124 Ring-associated Protein, ZapD, Bound to the C-terminal Domain of the Tubulin-

- 1125 like Protein, FtsZ, Suggests Mechanism of Z Ring Stabilization through FtsZ  
1126 Cross-linking. *J Biol Chem* **292**, 3740-3750 (2017).
- 1127 72. Ghosal, D., Trambaiolo, D., Amos, L.A. & Lowe, J. MinCD cell division proteins  
1128 form alternating copolymeric cytomotive filaments. *Nat Commun* **5**, 5341 (2014).
- 1129 73. Zhang, H.N. et al. Cyclic di-GMP regulates *Mycobacterium tuberculosis*  
1130 resistance to ethionamide. *Sci Rep* **7**, 5860 (2017).
- 1131 74. Harwood, C.R. & Cutting, S.M. *Molecular biological methods for Bacillus*, (Wiley,  
1132 New York, NY, 1990).
- 1133 75. Zhang, X.Z. & Zhang, Y. Simple, fast and high-efficiency transformation system  
1134 for directed evolution of cellulase in *Bacillus subtilis*. *Microb Biotechnol* **4**, 98-105  
1135 (2011).
- 1136 76. Schneider, C.A., Rasband, W.S. & Eliceiri, K.W. NIH Image to ImageJ: 25 years  
1137 of image analysis. *Nat Methods* **9**, 671-5 (2012).
- 1138 77. Otwinowski, Z. & Minor, W. [20] Processing of X-ray diffraction data collected in  
1139 oscillation mode. *Methods Enzymol* **276**, 307-326 (1997).
- 1140 78. Sheldrick, G.M. A short history of SHELX. *Acta Crystallogr A* **64**, 112-22 (2008).
- 1141 79. Zwart, P.H. Anomalous signal indicators in protein crystallography. *Acta*  
1142 *Crystallographica Section D, Biological Crystallography* **61**, 1437-48 (2005).
- 1143 80. Winn, M.D. et al. Overview of the CCP4 suite and current developments. *Acta*  
1144 *Crystallographica Section D, Biological Crystallography* **67**, 235-42 (2011).
- 1145 81. Adams, P.D. et al. PHENIX: a comprehensive Python-based system for  
1146 macromolecular structure solution. *Acta Crystallographica Section D, Biological*  
1147 *Crystallography* **66**, 213-21 (2010).
- 1148 82. Cowtan, K. The Buccaneer software for automated model building. 1. Tracing  
1149 protein chains. *Acta Crystallographica Section D, Biological Crystallography* **62**,  
1150 1002-11 (2006).
- 1151 83. Emsley, P., Lohkamp, B., Scott, W.G. & Cowtan, K. Features and development  
1152 of Coot. *Acta Crystallographica Section D, Biological Crystallography* **66**, 486-  
1153 501 (2010).
- 1154  
1155  
1156  
1157  
1158  
1159  
1160  
1161  
1162  
1163  
1164  
1165  
1166  
1167  
1168  
1169  
1170

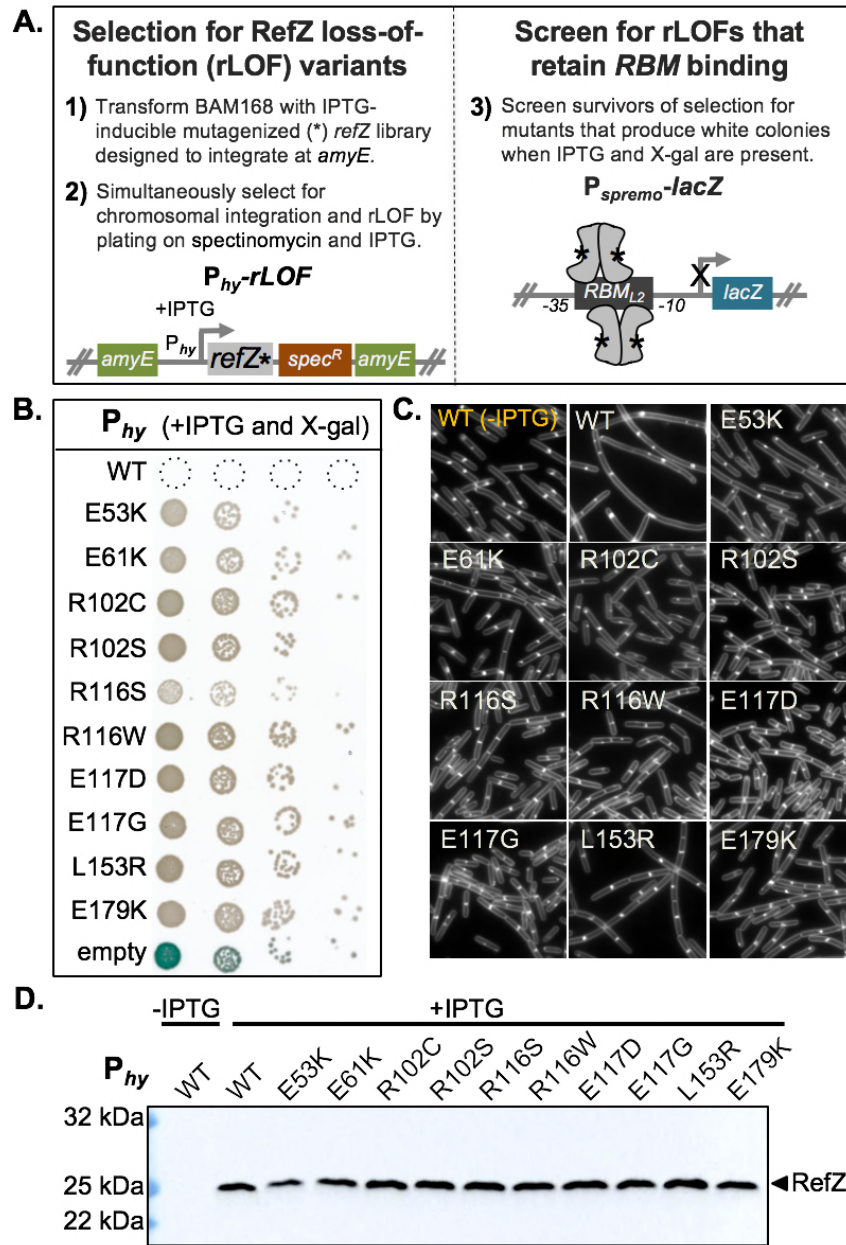

1171

1172 **Figure 1. Isolation of rLOF variants** (A) Schematic of genetic selection (left) and screen (right) used to  
 1173 isolate rLOF variants that retain RBM-binding activity. The open-reading frame of *refZ* was mutagenized  
 1174 by error-prone PCR (*refZ*\*), placed under an IPTG-inducible promoter (*P<sub>hy</sub>*), and introduced at the *amyE*  
 1175 locus of competent recipient cells (BAM168). Mutations that interfere with RefZ's division inhibition  
 1176 function (*P<sub>hy</sub>-rLOF*) permit growth in the presence of IPTG. Survivors were screened for RBM binding  
 1177 (*P<sub>spremo</sub>-lacZ*) on plates containing X-gal and IPTG. (B) Ten unique rLOF variants that do not kill following  
 1178 induction but retain RBM-binding function were identified in the selection-screen. (C) The rLOF  
 1179 misexpression constructs were introduced into a wild-type (*Bs168*) genetic background and the extent of  
 1180 cell filamentation in CH medium following 90 min of induction with 1 mM IPTG was monitored using  
 1181 epifluorescence microscopy. Membranes were stained with TMA (white). The uninduced wild-type (WT)  
 1182 control is labeled in yellow. (D) Western blot analysis to monitor the production and stability of wild-type  
 1183 RefZ (WT) and the rLOF variants following 45 min of induction with 1 mM IPTG. RefZ is not produced at  
 1184 levels detectable above background with our antibody during vegetative growth (Lane 1, uninduced) or  
 1185 sporulation (data not shown).

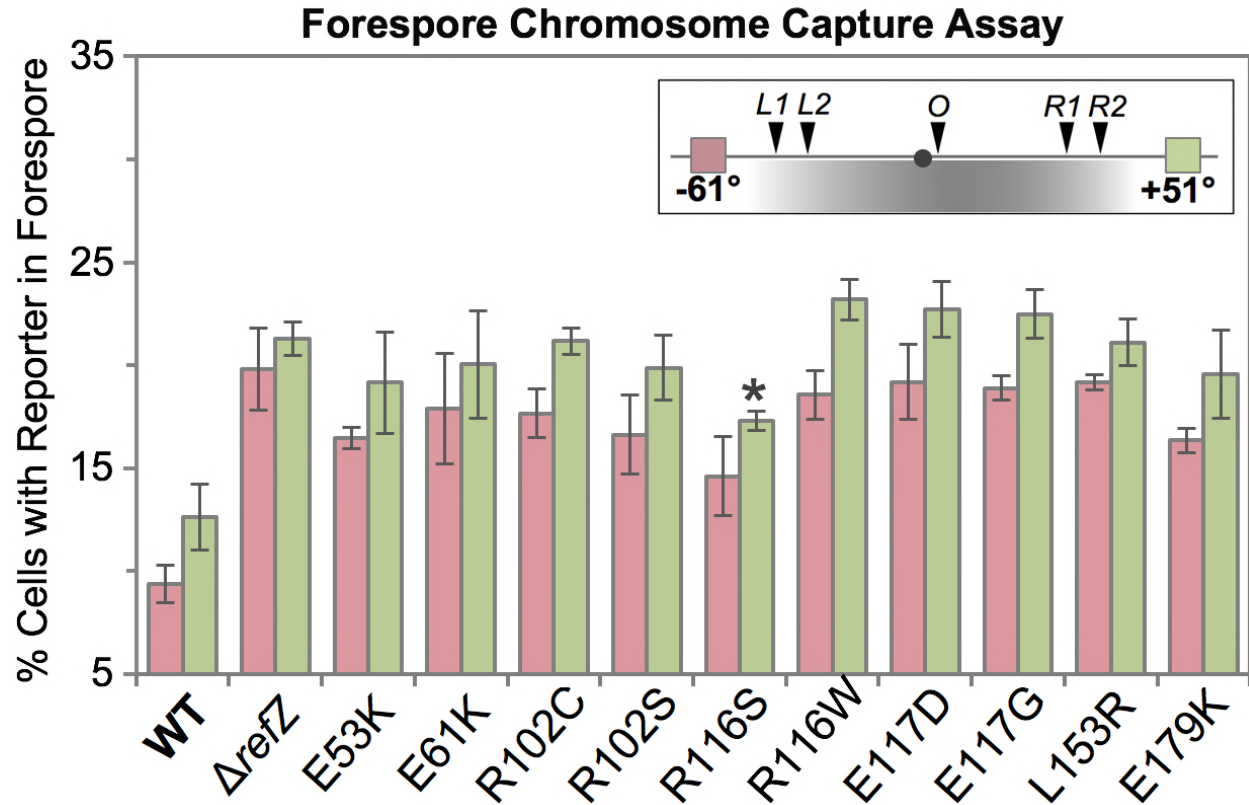

1186

1187

1188

1189

1190

1191

1192

1193

1194 **Figure 2. rLOF variants unable to inhibit cell division miscapture regions of the forespore**  
1195 **chromosome.** Quantitative single cell analysis of chromosome capture is represented as the average  
1196 percentage of cells that captured either the left arm ( $-61^\circ$ , pink) or right arm reporter ( $+51^\circ$ , green) in the  
1197 forespore at the time of polar division. The black circle represents *oriC* ( $0^\circ$ ). The inset indicates the  
1198 location of the reporters relative to the RBMs, with the region of chromosome typically captured in the  
1199 forespore shaded grey. All strains encoding rLOF variants miscapture the left and right arm reporters at  
1200 levels statistically indistinguishable from the  $\Delta refZ$  mutant control ( $P > 0.05$ ) with the exception of the  
1201 R116S variant. The R116S right arm reporter exhibited an intermediate capture defect that was  
1202 statistically different from both  $\Delta refZ$  (asterisk,  $P = 3.9 \times 10^{-3}$ ) and wild type ( $P = 2.3 \times 10^{-3}$ ). Error bars  
1203 represent standard deviations.



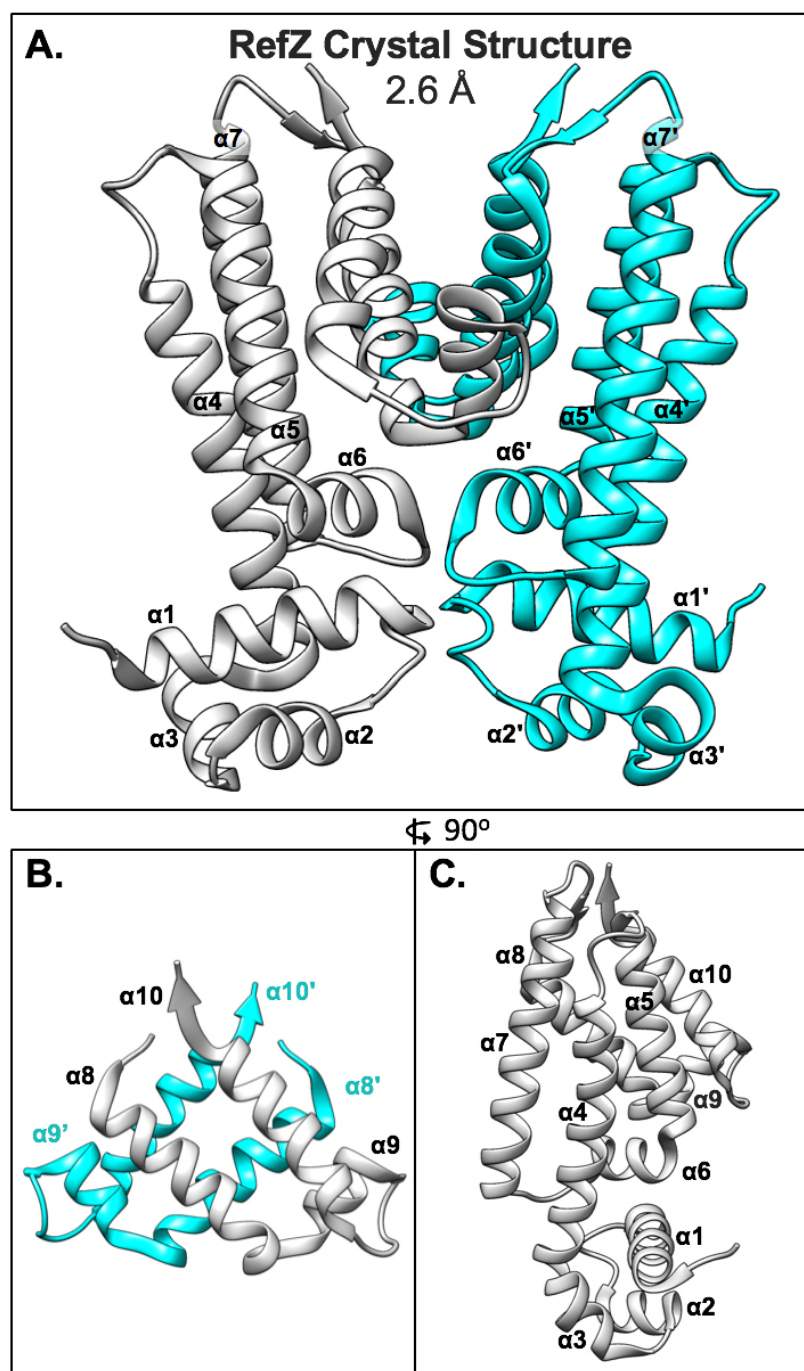

1204

1205

1206

1207

1208 **Figure 3. Crystal structure of the RefZ homodimer at 2.6 Å resolution.** (A) Structure of the RefZ

1209 homodimer. Subunits are colored grey and cyan. (B) Helices  $\alpha 8$ - $\alpha 10$  of RefZ's regulatory region with

1210 antiparallel helices  $\alpha 8$ ,  $\alpha 10$ ,  $\alpha 8'$ , and  $\alpha 10'$  comprising the four-helix dimerization motif. (C) The RefZ

1211 monomer, rotated 90° relative to panel A.

| PDB ID                                              | 6MJ1                              |
|-----------------------------------------------------|-----------------------------------|
| <b>Data collection</b>                              |                                   |
| Space group                                         | P 4 <sub>1</sub> 2 <sub>1</sub> 2 |
| Cell dimensions                                     |                                   |
| <i>a</i> , <i>b</i> , <i>c</i> (Å)                  | 100.021, 100.021, 100.177         |
| $\alpha$ , $\beta$ , $\gamma$ (°)                   | 90, 90, 90                        |
| Resolution (Å)                                      | 2.6                               |
| <i>R</i> <sub>merge</sub>                           | 0.11 (0.79)                       |
| <i>I</i> / $\sigma$ <i>I</i>                        | 11.59                             |
| Completeness (%)                                    | 100 (100)                         |
| Redundancy                                          | 17.6 (15.6)                       |
| <b>Refinement</b>                                   |                                   |
| Resolution (Å)                                      | 44.952-2.6                        |
| No. reflections                                     | 16,039                            |
| <i>R</i> <sub>work</sub> / <i>R</i> <sub>free</sub> | 22.20 / 25.36                     |
| No. atoms                                           |                                   |
| Protein                                             | 1,683                             |
| Water                                               | 25                                |
| <i>B</i> -factors                                   |                                   |
| Protein                                             | 76                                |
| R.m.s. deviations                                   |                                   |
| Bond lengths (Å)                                    | 0.009                             |
| Bond angles (°)                                     | 1.082                             |

1212 **Table 1.** Data collection, phasing and refinement statistics  
1213 for the RefZ structure.

1214

1215

1216

1217

1218

1219

1220

1221

1222

1223

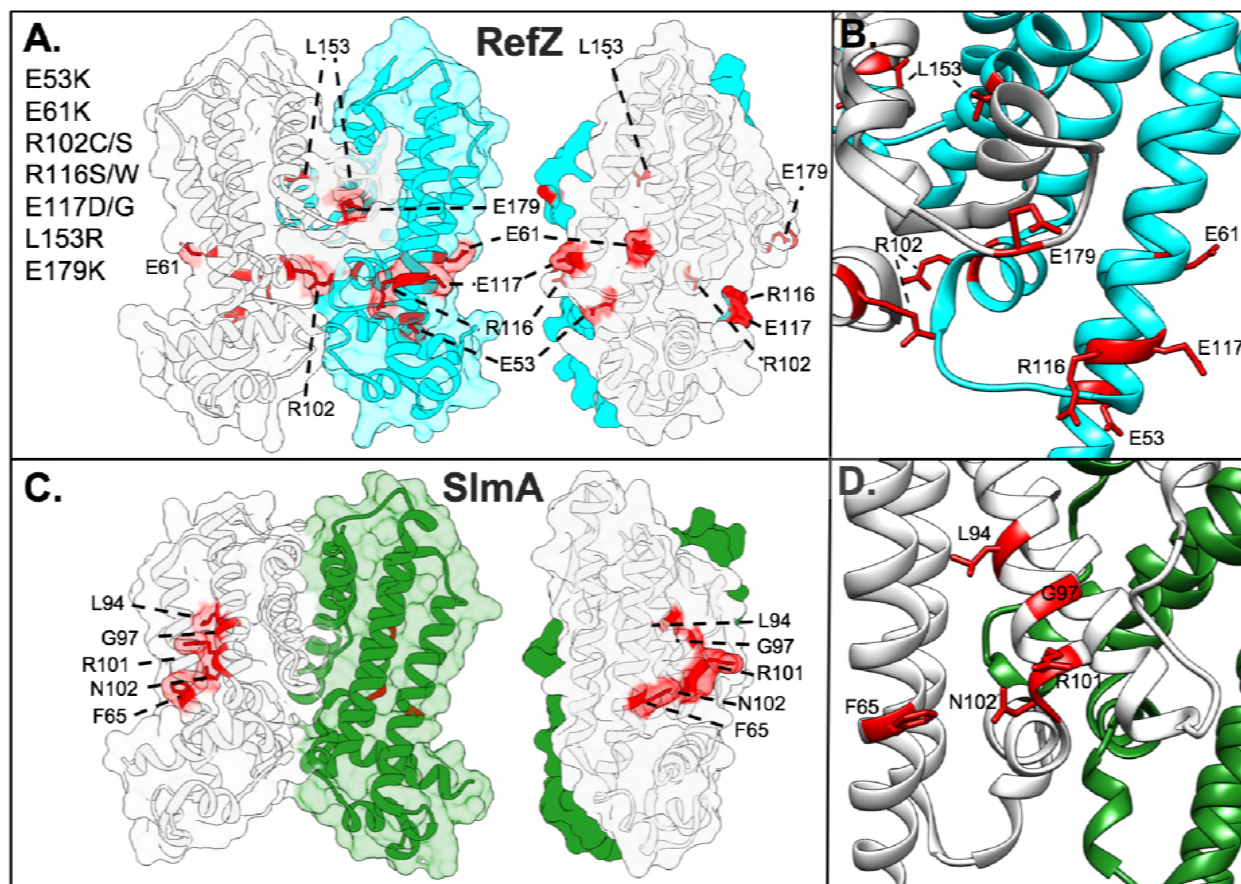

1224

1225

1226

1227

1228

1229

1230

1231

1232 **Figure 4. Position of residues implicated in RefZ's regulation of cell division** (A) Surface/cartoon  
1233 representation of the RefZ homodimer highlighting residues with substitutions conferring loss-of-function  
1234 (red, sticks). Subunits are colored white and cyan. (B) Ribbon model of RefZ region showing residues  
1235 conferring loss of function as sticks. (C) Surface/cartoon representation of the SlmA homodimer (PDB:  
1236 5HBU) highlighting residues with substitutions conferring loss of function (red, sticks). Subunits are  
1237 colored white and green. (D) Ribbon model of SlmA region showing residues conferring loss of function  
1238 as sticks.

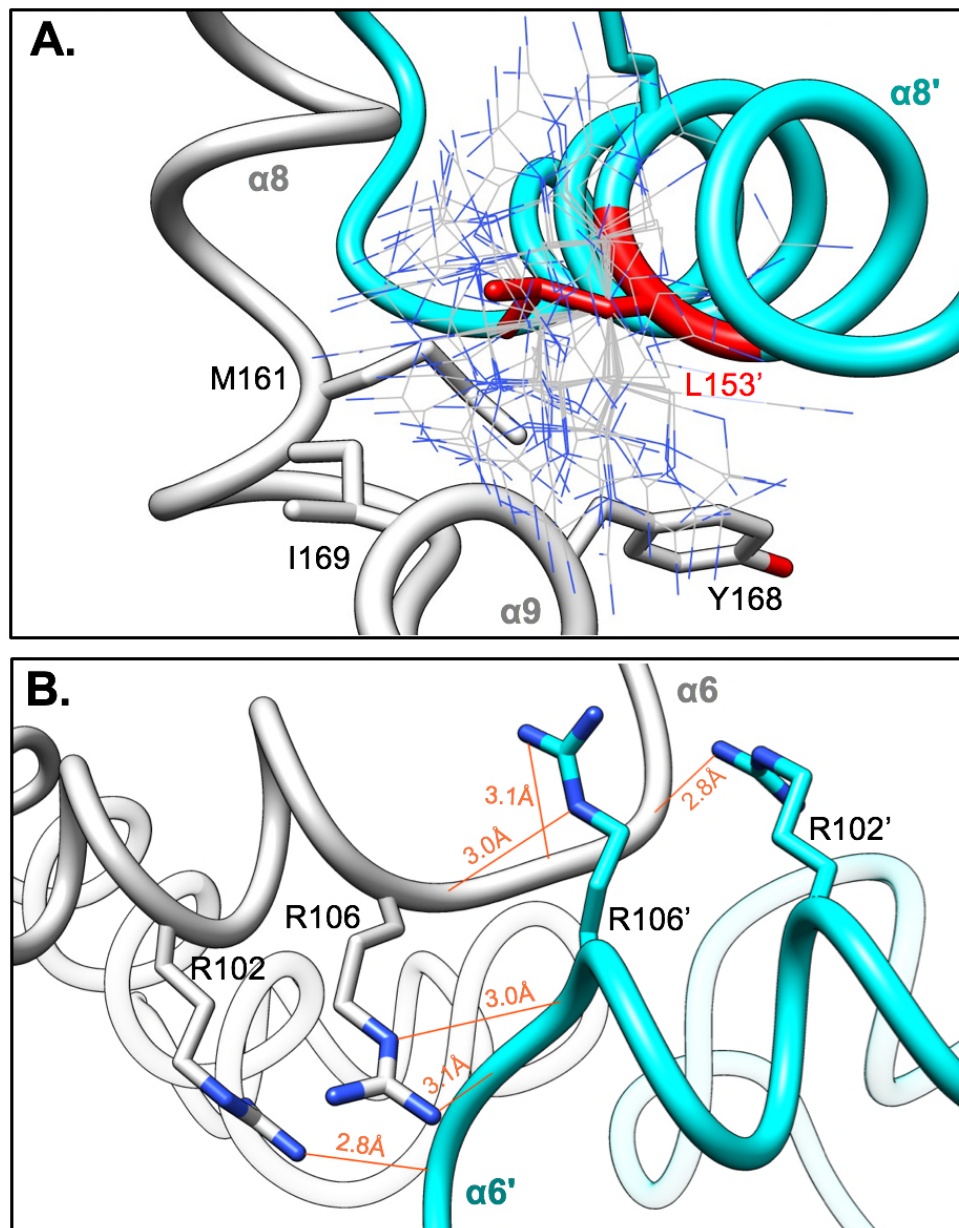

1239  
1240  
1241  
1242  
1243  
1244  
1245  
1246  
1247  
1248  
1249  
1250  
1251  
1252  
1253  
1254

**Figure 5. Dimer interface residues implicated in RefZ function.** RefZ subunits are shown in light gray and cyan. (A) Hydrophobic dimerization interface near the L153 residue. Thin blue and gray sticks display possible positions of an R153 side-chain based on a rotamer library. (B) Helices  $\alpha 6$  and  $\alpha 6'$  of RefZ with residues implicated in loss of function shown as sticks. The hydrogen bonds formed across the dimer interface by R102 and R106 are displayed as red lines.

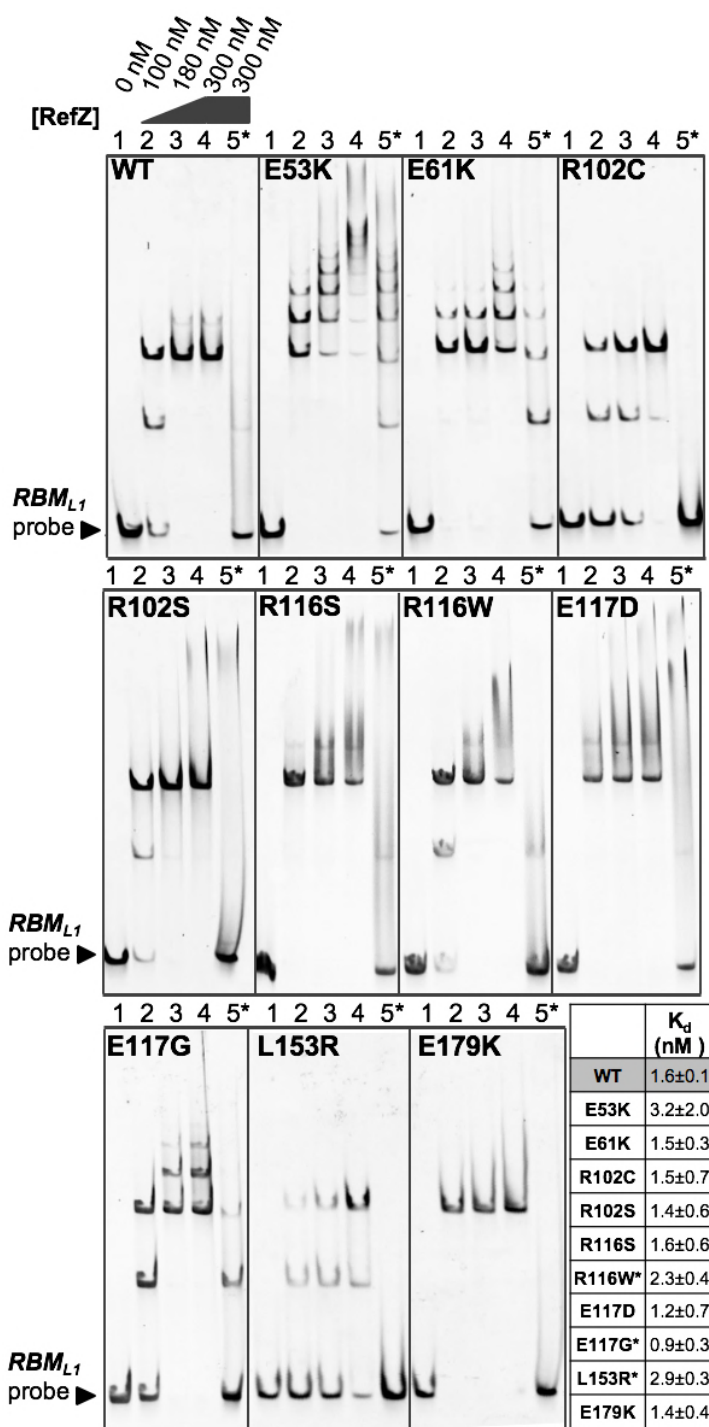

1255

1256 **Figure 6. Interaction of the rLOF variants with DNA.** Electrophoretic mobility shift assays were  
 1257 performed with 150 bp DNA probes (10 nM) centered on either the wild-type (lanes 1-4) or the mutant  
 1258 (lane 5\*) *RBM<sub>L1</sub>* sequence. Probes were incubated with the indicated concentrations of purified RefZ-His6  
 1259 (WT) or rLOF-His6 variants for 30 min. Reactions were run on a 5% TBE gel for 30 min at 150 V. The  
 1260 tabulated  $K_d$  values of RefZ for an immobilized 41 bp *RBM*-containing DNA segment were determined  
 1261 using a bio-layer interferometry assay. All the variants possessed  $K_d$  values within 2-fold of the wild-type  
 1262  $K_d$ . The differences in  $K_d$  between wild-type RefZ and R116W, E117G, and L153R are significant  
 1263 (indicated by asterisks)( $P=0.05$ ,  $P=0.025$ , and  $P=0.003$ , respectively).

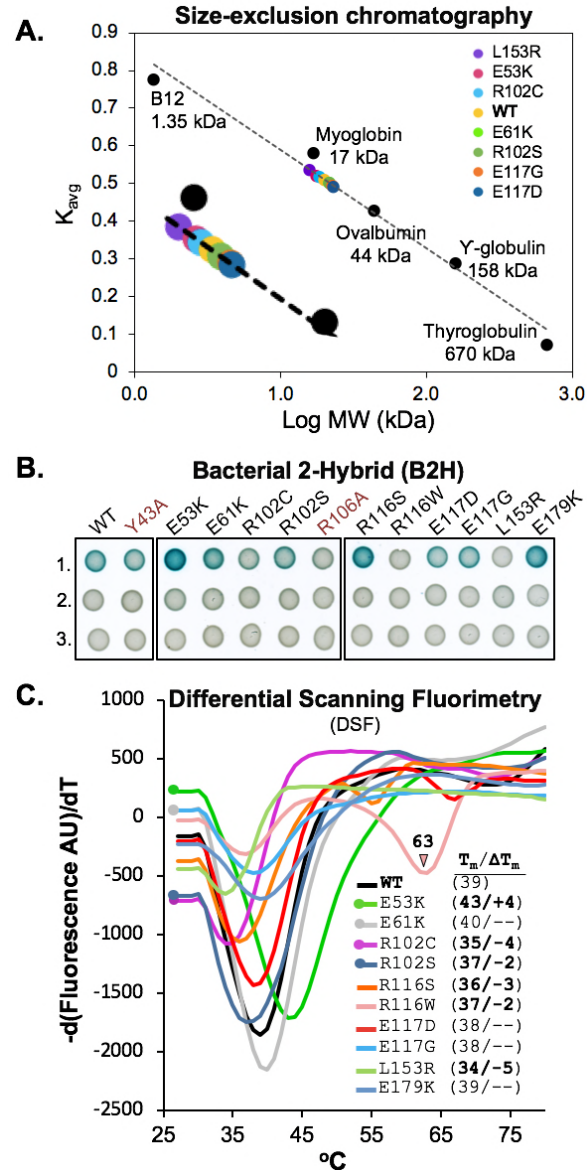

1264

1265 **Figure 7. Oligomeric state and thermostability of wild-type RefZ and the rLOF variants.** (A) Size-  
 1266 exclusion chromatography of wild-type RefZ-His6 and a subset of rLOF-His6 variants on a Superdex 200  
 1267 column. The  $K_{avg}$  values for the indicated standards were used to generate a standard curve and to  
 1268 estimate the apparent molecular weights of the experimental samples. The E61K and R102C variants  
 1269 share the same position on the curve and only R102C (cyan) is visible. (B) Self-interaction of wild-type  
 1270 RefZ or rLOF variants in a B2H assay. The RefZ variants in red (Y43A and R106A) were generated by  
 1271 site-directed mutagenesis and do not bind *RBM*-containing DNA. Wild-type RefZ subunits or the subunits  
 1272 of the indicated variants were fused to T25 and T18 tags. Pairwise interactions between wild-type RefZ  
 1273 subunits or the subunits of the indicated variants fused to T25 and T18 tags (row 1), T25 tagged subunits  
 1274 paired with an empty T18 vector (row 2), or T18 tagged subunits paired with an empty T25 vector (row 3).  
 1275 Color development after 41 h of growth at room temperature is shown. (C) DSF of wild-type RefZ-His6  
 1276 and the rLOF-His6 variants. Protein stability is reported by fluorescence of SYPRO orange as a function  
 1277 of increasing temperature.  $T_m$  values were calculated by determining the temperature at which the first  
 1278 derivative,  $d(\text{Fluorescence AU})/dT$ , is at a minimum.  $\Delta T_m$  (inset) is the difference in  $T_m$  values between  
 1279 wild-type RefZ and each rLOF variant. A  $\Delta T_m$  value of 1.5°C or less was not considered to be significant,  
 1280 and is shown as a dash.

|           | <b>EMSA laddering</b> | <b>RBM specificity</b> | <b>K<sub>d</sub></b> | <b>Self-interaction</b> | <b>ΔT<sub>m</sub> (°C)</b> |
|-----------|-----------------------|------------------------|----------------------|-------------------------|----------------------------|
| <b>WT</b> | ++                    | +++                    | ++                   | ++                      | -                          |
| E53K      | ++++                  | +                      | ++                   | ++++                    | +4                         |
| E61K      | ++++                  | +                      | ++                   | ++                      | -                          |
| R102C     | +                     | +++                    | ++                   | +                       | -4                         |
| R102S     | +                     | +++                    | ++                   | ++                      | -2                         |
| R116S     | ++                    | +++                    | ++                   | +++                     | -3                         |
| R116W     | ++                    | +++                    | +                    | -                       | -2                         |
| E117D     | ++                    | +++                    | ++                   | ++                      | -                          |
| E117G     | +++                   | ++                     | +++                  | ++                      | -                          |
| L153R     | -                     | +++                    | +                    | -                       | -5                         |
| E179K     | ++                    | +++                    | ++                   | +++                     | -                          |

**Table 2. Summary of rLOF phenotypes.**

1281  
1282  
1283  
1284  
1285  
1286  
1287  
1288  
1289  
1290  
1291  
1292  
1293  
1294  
1295  
1296  
1297  
1298  
1299  
1300  
1301  
1302  
1303  
1304  
1305  
1306  
1307  
1308  
1309  
1310  
1311

1312 **Supporting Information Captions**

1313

1314 **S1 Table. Strains**

1315

1316 **S1 Methods. Strain construction**

1317

1318 **S2 Table. Plasmids**

1319

1320 **S2 Methods. Plasmid construction**

1321

1322 **S3 Table. Oligonucleotides**

1323

1324 **S1 Figure. Superimposition of the N-terminal domains of RefZ and QacR.** (A)

1325 Superimposition of the HTH domains of RefZ (cyan) and QacR (orange)(PDB: 1JT6)<sup>4</sup>.

1326 The Y43 residue on  $\alpha 3$  of RefZ, which is required for DNA binding and the corresponding

1327 residue in QacR (Y41) are shown as sticks. (B) Superimposition of RefZ dimer (cyan)

1328 with the QacR dimer (orange) bound to *IR1* DNA (white)(PDB: 1JT0)<sup>5</sup>. (C)

1329 Superimposition of the HTH domains of RefZ (cyan) with QacR (orange) bound to *IR1*

1330 DNA (white)(PDB 1JT0).

1331

1332 **S2 Figure. Example purification profiles of wild-type RefZ and rLOF variants.** The

1333 top gel was loaded with 5  $\mu\text{g}$  protein/lane and stained with coomassie blue dye (R-250).

1334 Gels below show example elution profiles from Nickel-NTA agarose beads. The elution

1335 gels were stained with coomassie brilliant blue dye (colloidal coomassie, G-250). G-250

1336 is approximately 10 times more sensitive than R-250, allowing for detection of less

1337 abundant proteins.

1338

1339 **S3 Figure. EMSA laddering behavior of wild-type RefZ and rLOF variants.** (A)

1340 Laddering of DNA in the EMSAs can be observed for wild-type RefZ and to a greater

1341 extent E53K when samples are resolved at 200 V on a 7.5% TBE gel. (B)The rLOF

1342 variants R102C, R102S, and L153R do not exhibit laddering when samples are resolved

1343 at 200 V on a 7.5% TBE gel. (C) Typical bio-layer interferometry binding curve for wild-

1344 type RefZ with *RBM*-containing DNA. Sensors are pre-equilibrated for 10 min in DNA

1345 binding buffer (150 mM KCl and 10 mM Tris [pH 8]) at room temperature (not shown).

1346 The experiment is then initiated and performed at 30°C to establish a 30 sec baseline.

1347 The streptavidin sensor is dipped into a solution of biotinylated dsDNA (a 41 bp segment

1348 centered on *RBM<sub>L1</sub>*) for 2 min. After incubation a new baseline is established by

1349 returning the biosensor to the DNA-binding buffer for 30 sec. The biosensor is then

1350 moved to a well containing 800 nM protein for 3 min to monitor association. The sensor

1351 is then transferred to a well containing fresh DNA-binding buffer to monitor dissociation

1352 for 15 min.

1353

1354 **S4 Figure. Size-exclusion chromatogram for WT RefZ.** An example Superdex 200

1355 elution profile for 200  $\mu\text{l}$  of 1  $\mu\text{g ml}^{-1}$  RefZ-His6 (7.7 nmol) ran with 50 mM Tris-HCl [pH

1356 9], 300 mM KCl and 10% (v/v) glycerol. Absorbance at 280 nm is shown on the Y-axis



1357 (mAU – milliabsorbance units). Aggregated RefZ elutes at 7.6 ml, near the column void  
1358 volume (7.0 ml).

1359

1360 **S5 Figure. Thermostability of RefZ and the rLOF variants.** DSF estimates of wild-  
1361 type RefZ-His6 and rLOF-His6 variant stability reported by fluorescence of SYPRO  
1362 orange as a function of increasing temperature. (A) Representative sigmoidal melting  
1363 curves. (B)  $T_m$  values (inset) were calculated by determining the temperature at which  
1364 the first derivative of the fluorescence is at a minimum.  $\Delta T_m$  (inset) is the difference  
1365 between the wild-type RefZ and each rLOF variant. Differences less than 1.5°C were  
1366 not considered to be significant and are shown as dashes.

1367

### 1368 **Supporting Information References**

1369

- 1370 1. Wagner-Herman, J.K. et al. RefZ facilitates the switch from medial to polar division  
1371 during spore formation in *Bacillus subtilis*. *J Bacteriol* **194**, 4608-18 (2012).
- 1372 2. Miller, A.K., Brown, E.E., Mercado, B.T. & Herman, J.K. A DNA-binding protein defines  
1373 the precise region of chromosome capture during *Bacillus* sporulation. *Mol Microbiol* **99**,  
1374 111-22 (2016).
- 1375 3. Gibson, D.G. et al. Enzymatic assembly of DNA molecules up to several hundred  
1376 kilobases. *Nat Methods* **6**, 343-5 (2009).
- 1377 4. Schumacher, M.A. et al. Structural mechanisms of QacR induction and multidrug  
1378 recognition. *Science* **294**, 2158-63 (2001).
- 1379 5. Schumacher, M.A. et al. Structural basis for cooperative DNA binding by two dimers of  
1380 the multidrug-binding protein QacR. *EMBO J* **21**, 1210-8 (2002).

1381
